# Supplementary material for: Synthesis, Insecticidal, Fungicidal Activities and Structure–Activity Relationships of Tschimganin Analogs
Source: MDPI journal article supplement (doi:10.3390/molecules23061473), 2018-06-18
Supplement: s1 [file s1]

**Supplementary Material**

**Synthesis, Insecticidal, Fungicidal Activity and  
Structure–Activity Relationships of Tschimganin Analogs**

Yueting Zhou<sup>1</sup>, Chunjuan Wang<sup>1</sup>, Fang Xin<sup>1</sup>, Xiaoqiang Han<sup>1\*</sup>, Jie Zhang<sup>2\*</sup>, Ke Sun<sup>3</sup>

1. Key Laboratory at Universities of Xinjiang Uygur Autonomous Region for Oasis Agricultural Pest Management and Plant Protection Resource Utilization / College of Agricultural, Shihezi University, Shihezi 832002, China
2. Key Laboratory for Green Processing of Chemical Engineering of Xinjiang Production and Construction Group / School of Chemistry and Chemical Engineering, Shihezi 832003, Xinjiang, China
3. State Key Laboratory of the Discovery and Development of Novel Pesticide / Shenyang Sinochem Agrochemicals R&D Co. Ltd., No.8-1 Shenliao Dong Road, Tiexi District, Shenyang 110021, Liaoning, China

\* Corresponding author. Tel. +86-10-2058060

E-mail: [hanshz@shzu.edu.cn](mailto:hanshz@shzu.edu.cn) and [zhangjie-xj@163.com](mailto:zhangjie-xj@163.com)

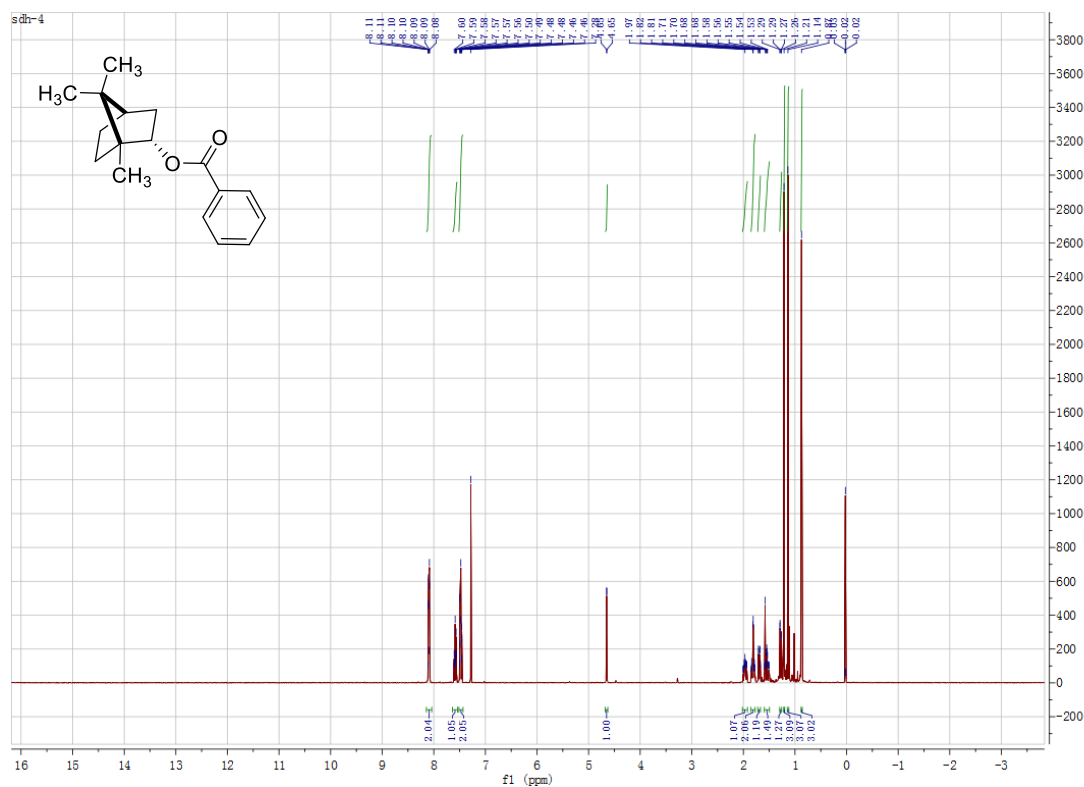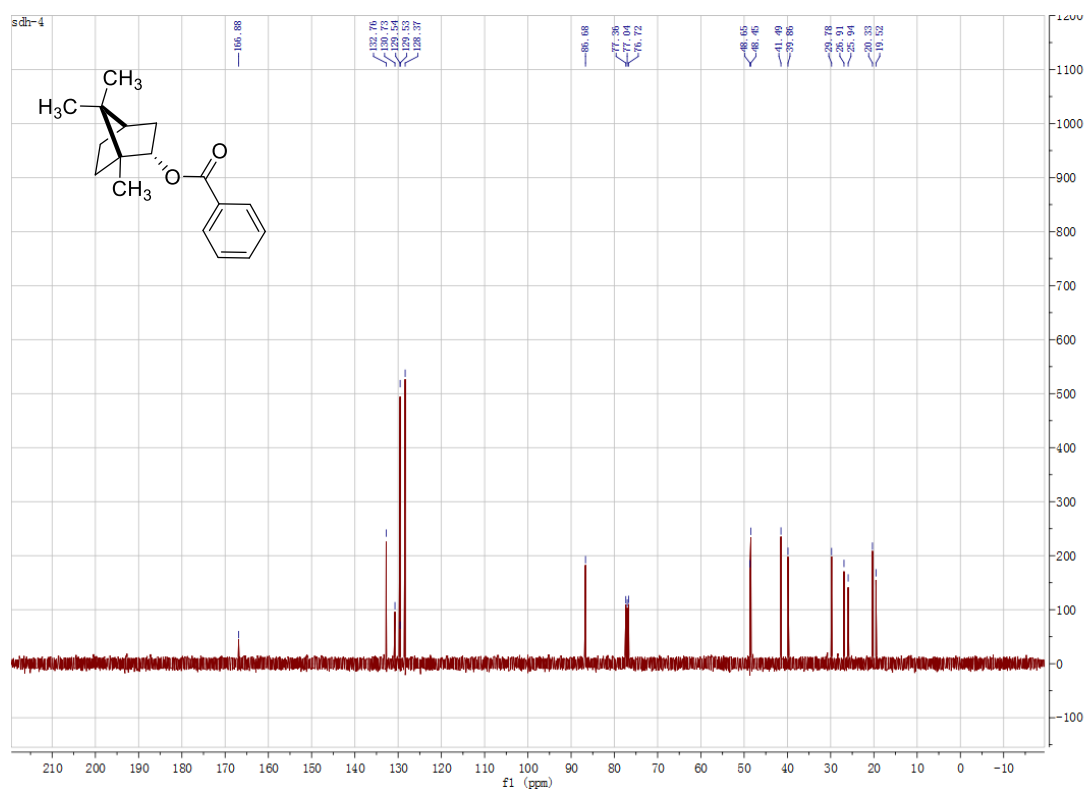

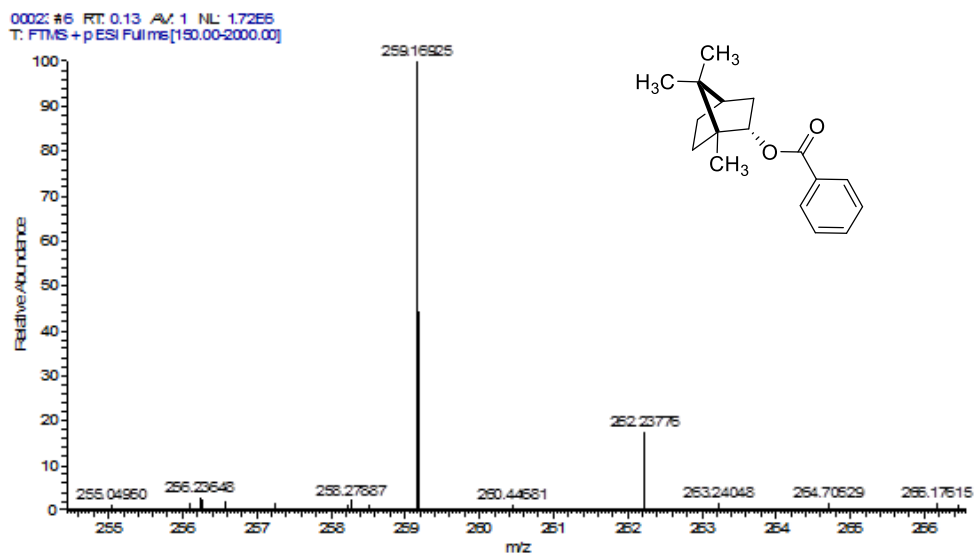

Figure 3 HRMS of 3a

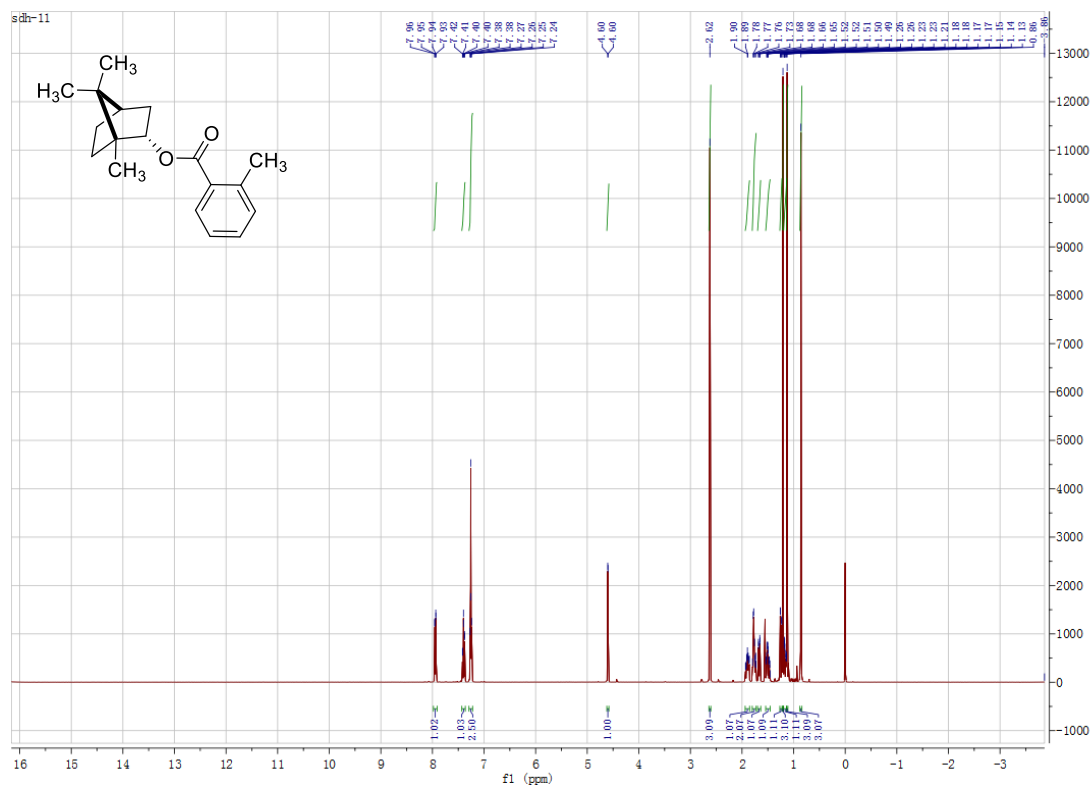

Figure 4  $^1\text{H}$ -NMR of 3b

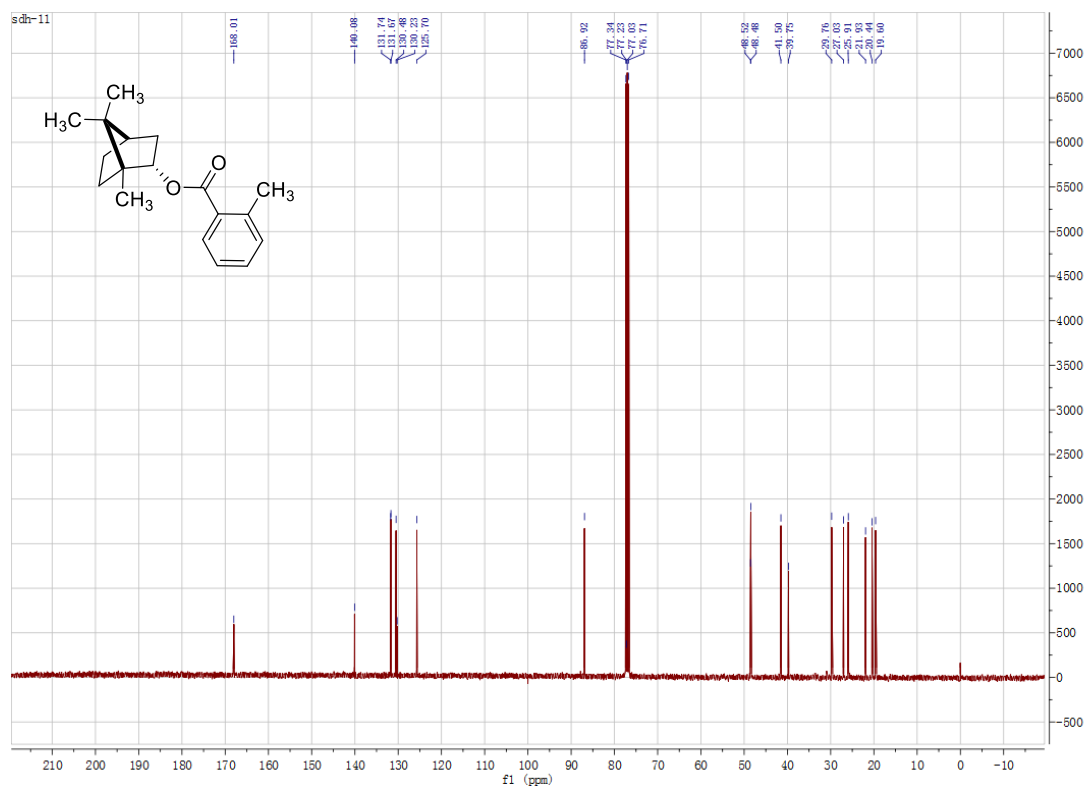

Figure 5  $^{13}\text{C}$ -NMR of **3b**

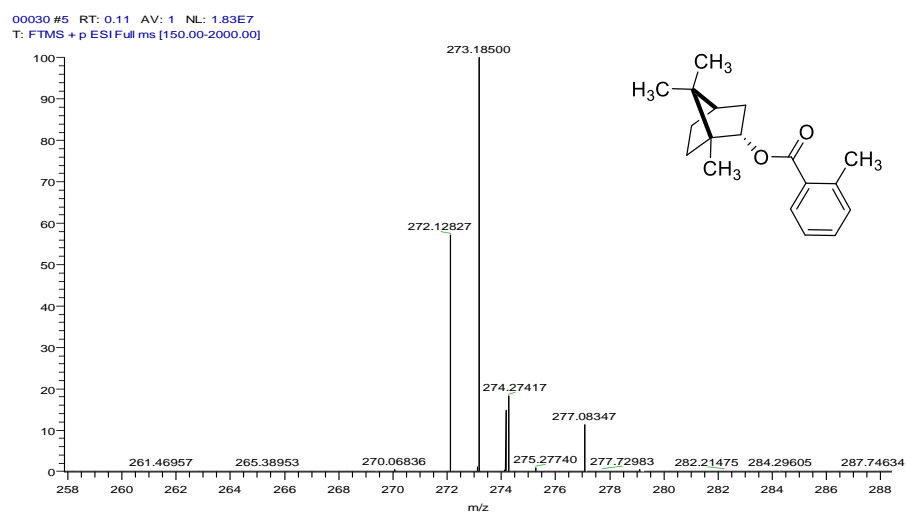

Figure 6 HRMS of **3b**

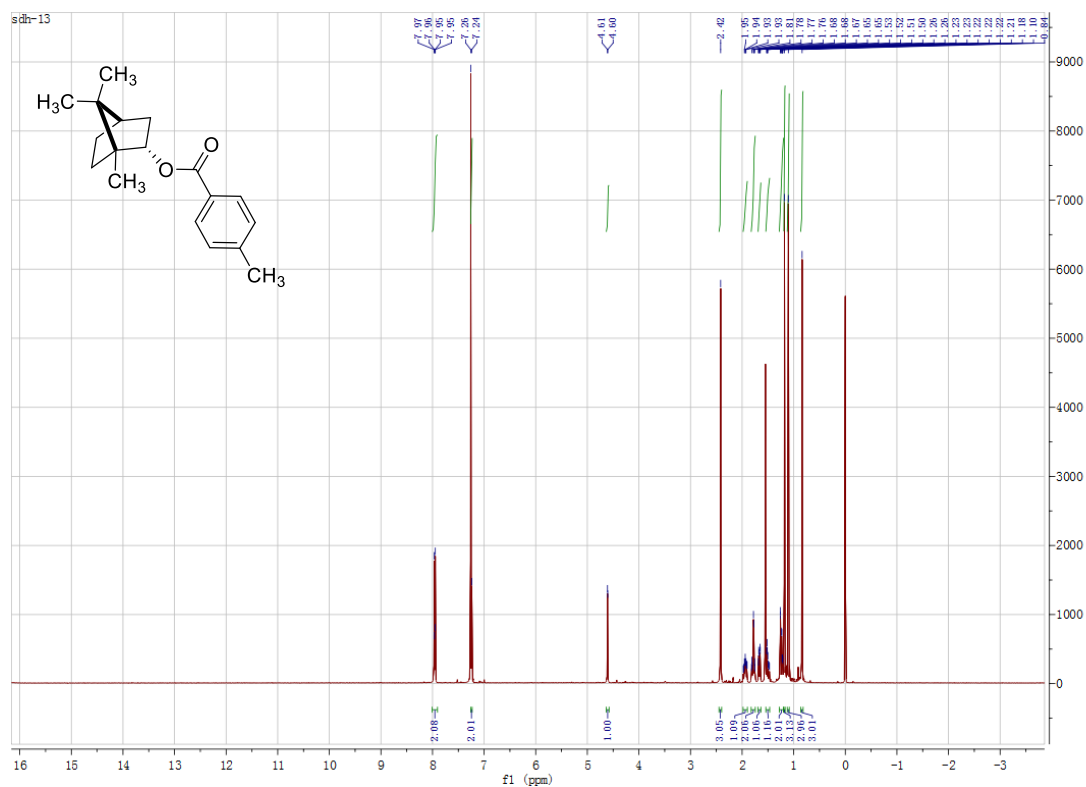

Figure 7 <sup>1</sup>H-NMR of **3c**

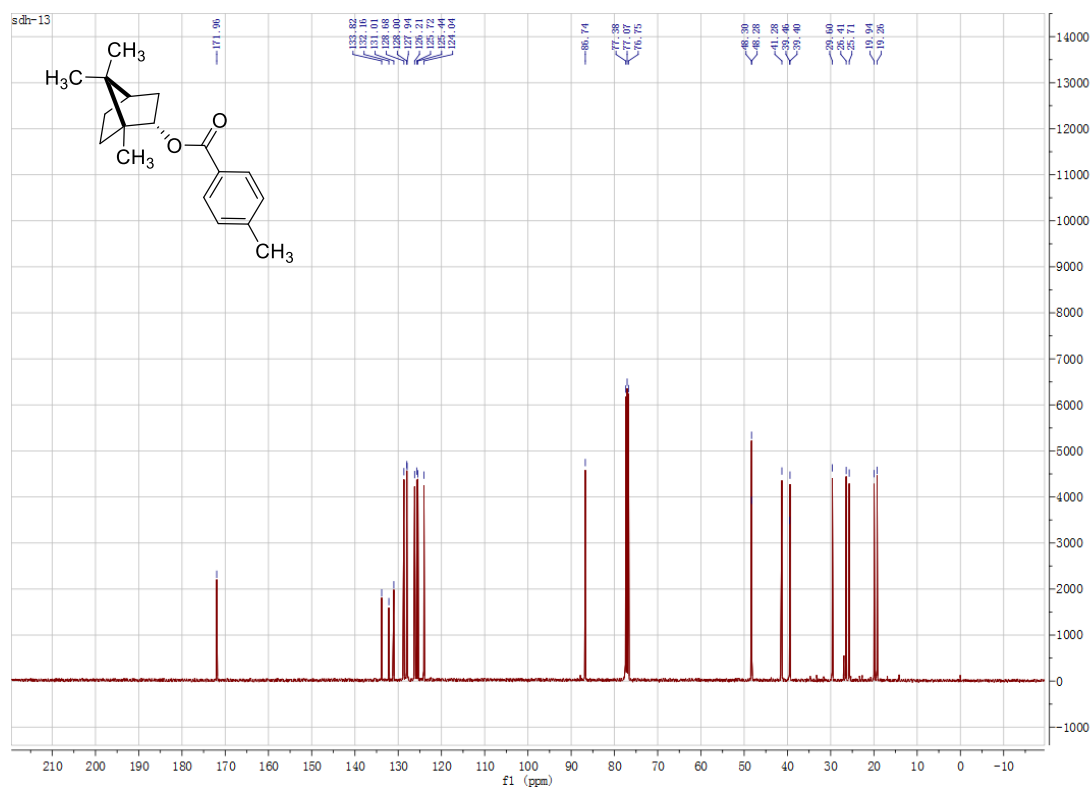

Figure 3 <sup>13</sup>C-NMR of **3c**

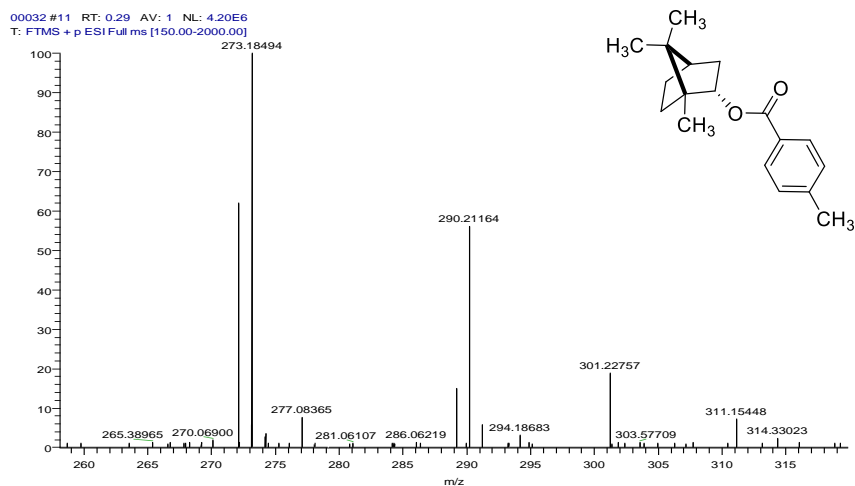

Figure 9 HRMS of **3c**

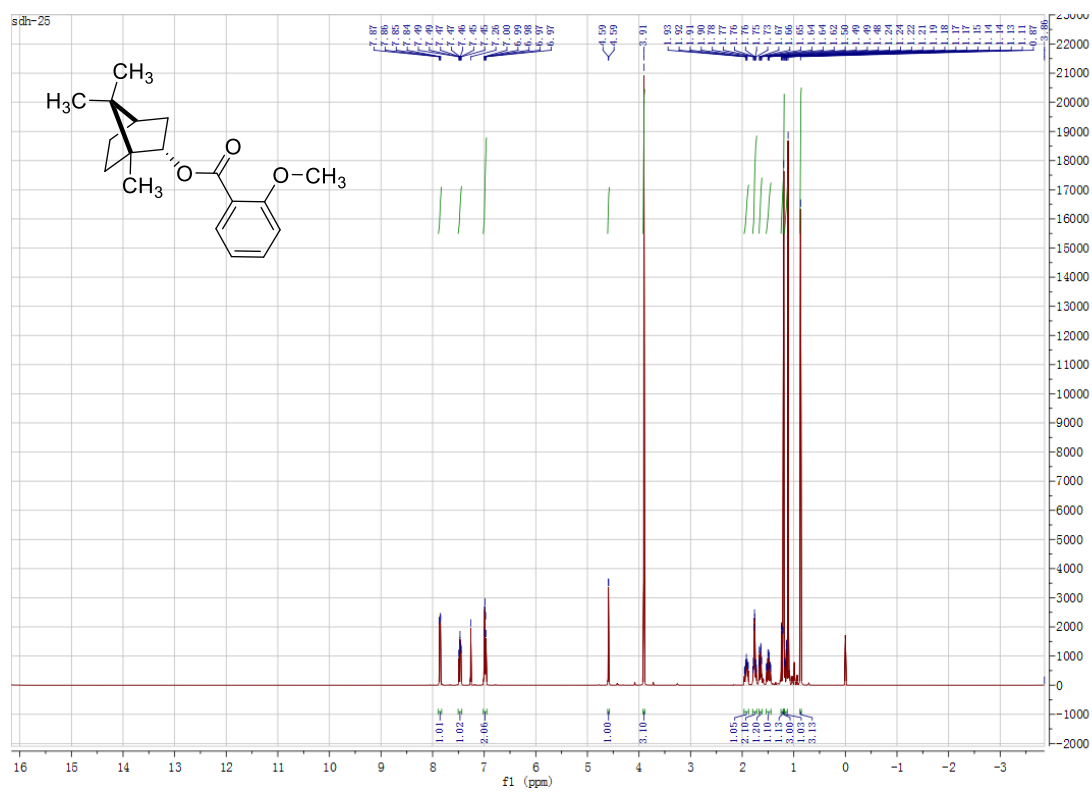

Figure 10  $^1\text{H}$ -NMR of **3d**

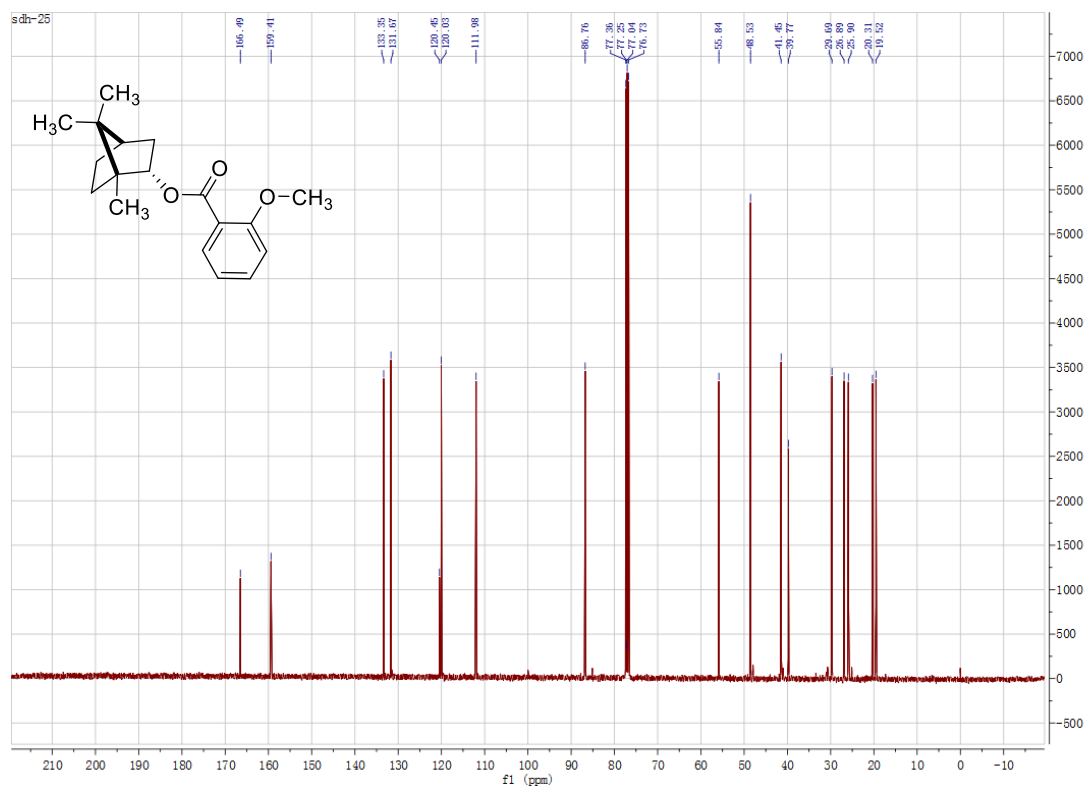

Figure 11  $^{13}\text{C}$ -NMR of 3d

00037 #22 RT: 0.62 AV: 1 NL: 8.02E5  
T: FTMS + p ESI Full ms [150.00-2000.00]

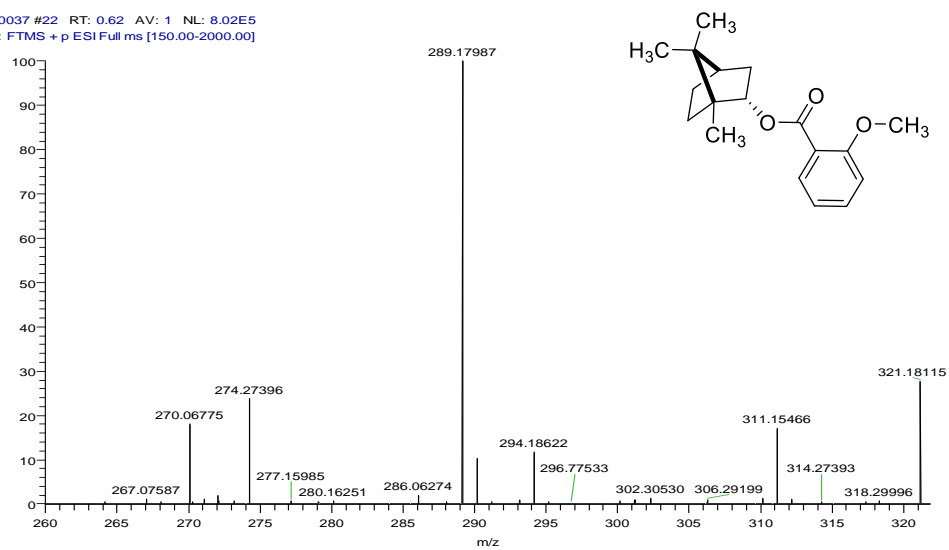

Figure 12 HRMS of 3d

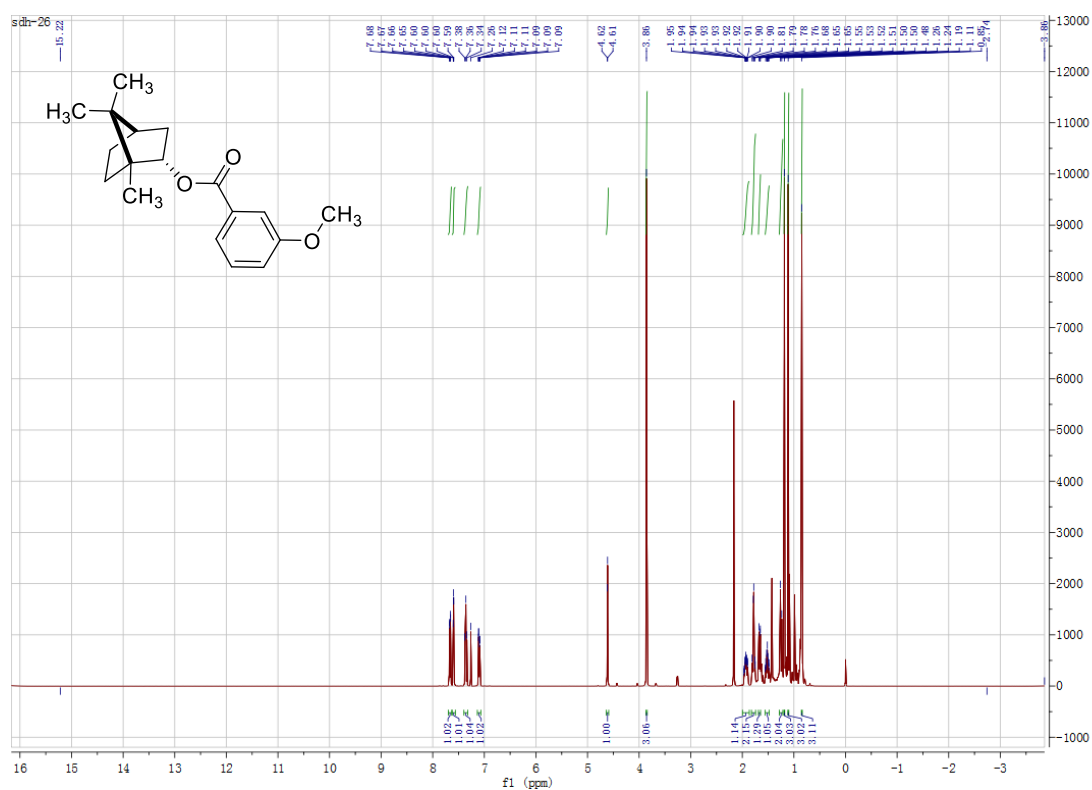



00038 #45 RT: 1.31 AV: 1 NL: 9.06E5  
T: FTMS + p ESI Full ms [150.00-2000.00]

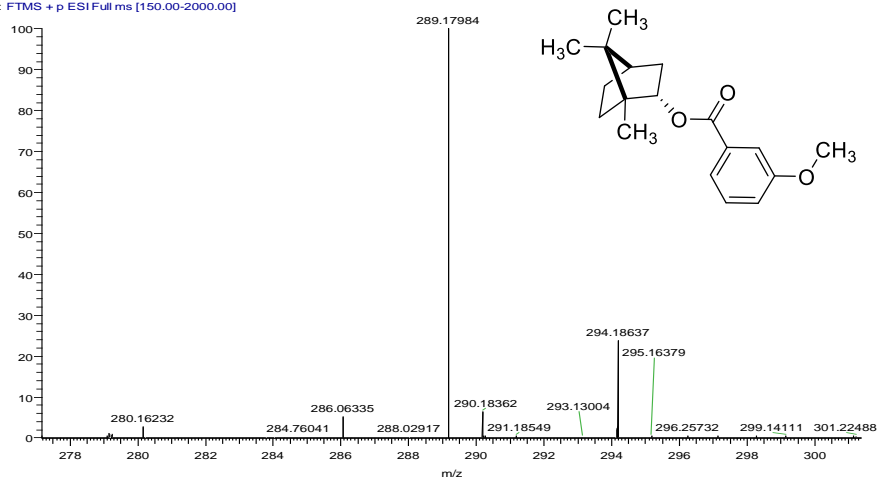

Figure 15 HRMS of 3e

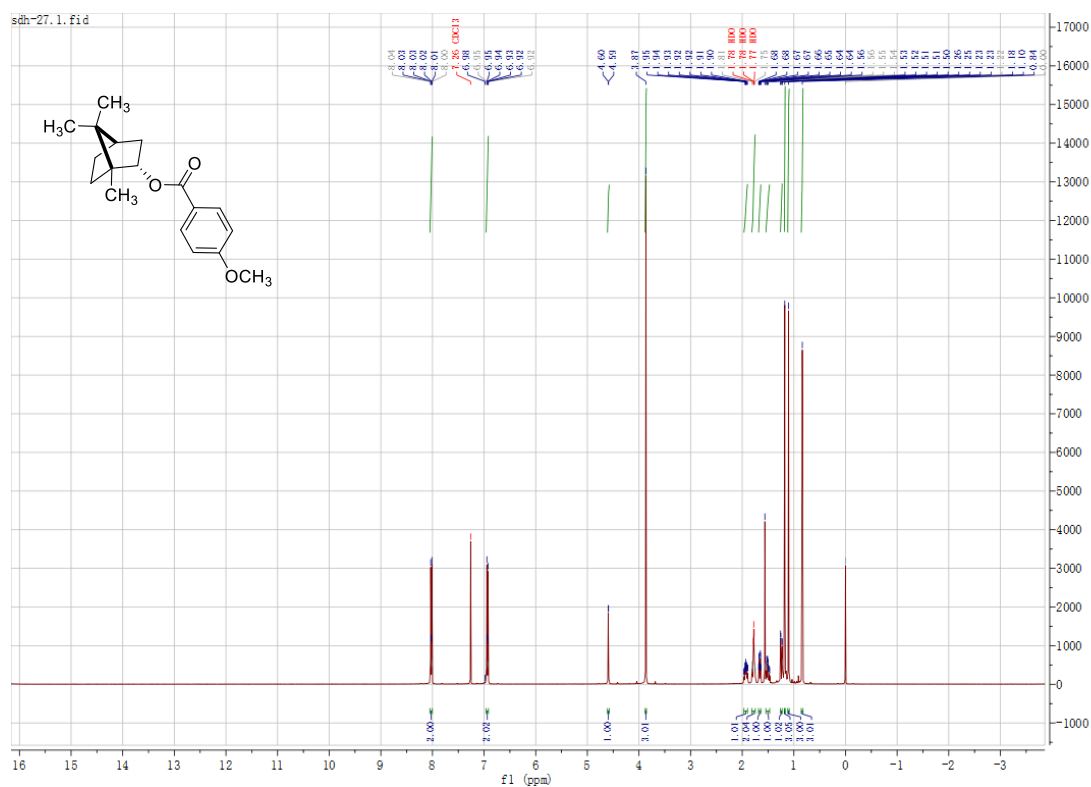

Figure 16 <sup>1</sup>H-NMR of 3f

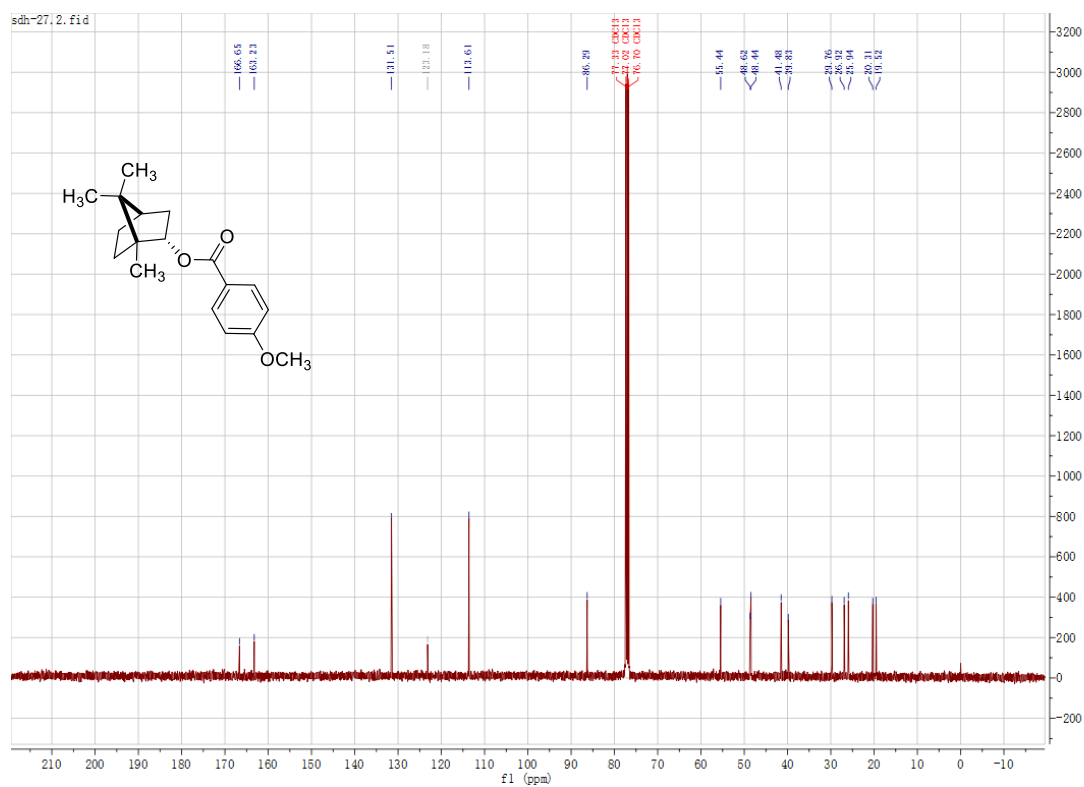

Figure 17 <sup>13</sup>C-NMR of 3f

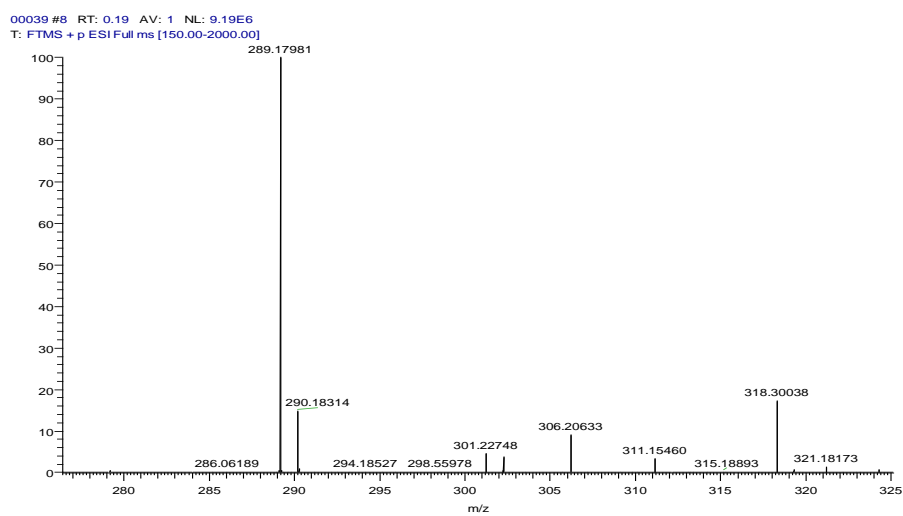

Figure 13 HRMS of 3f

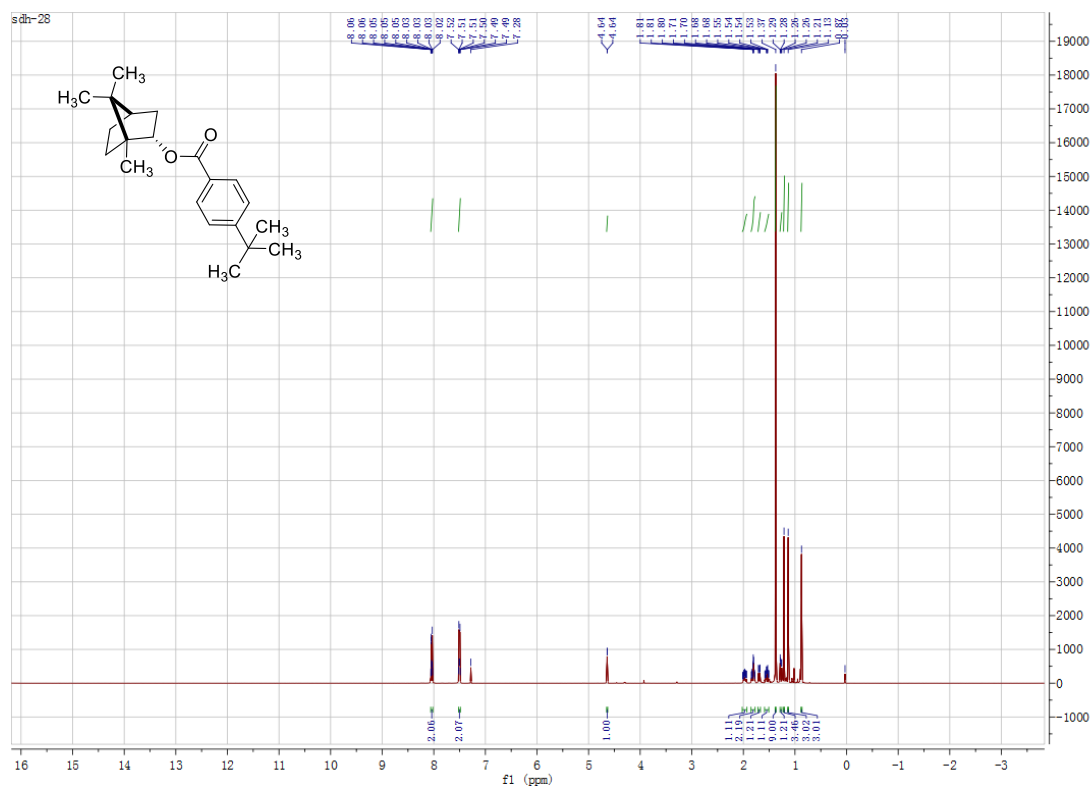

Figure 19 <sup>1</sup>H-NMR of **3g**

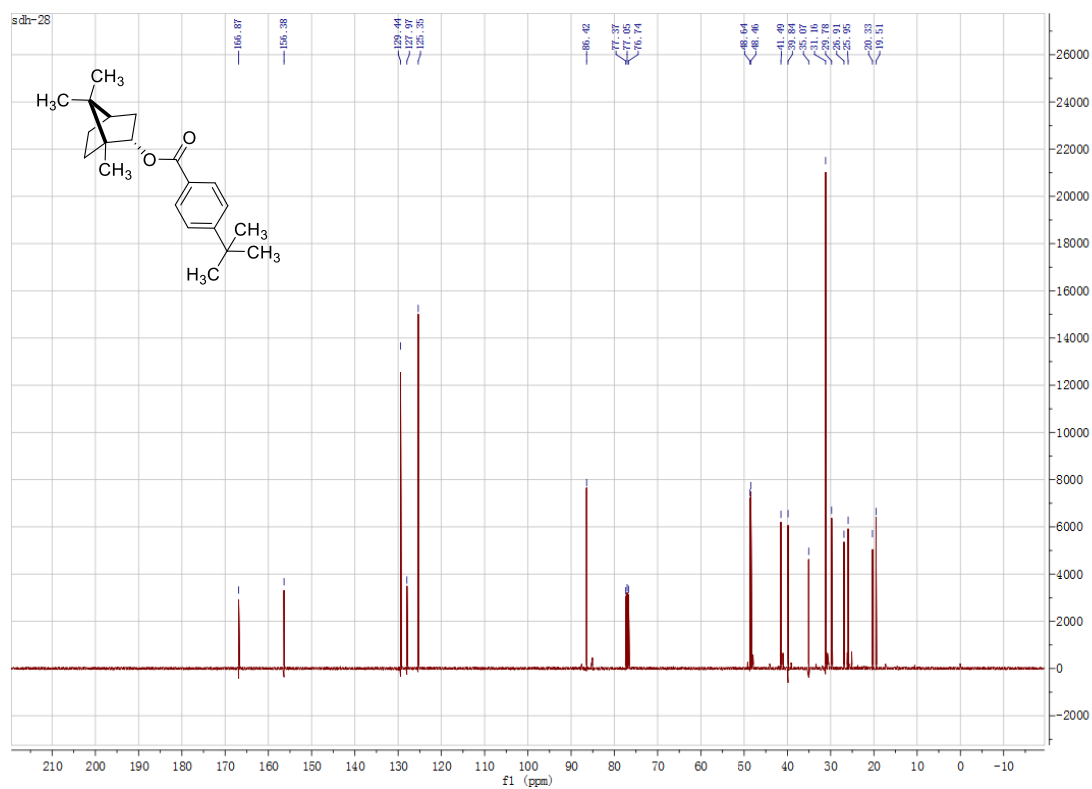

Figure 20 <sup>13</sup>C-NMR of **3g**

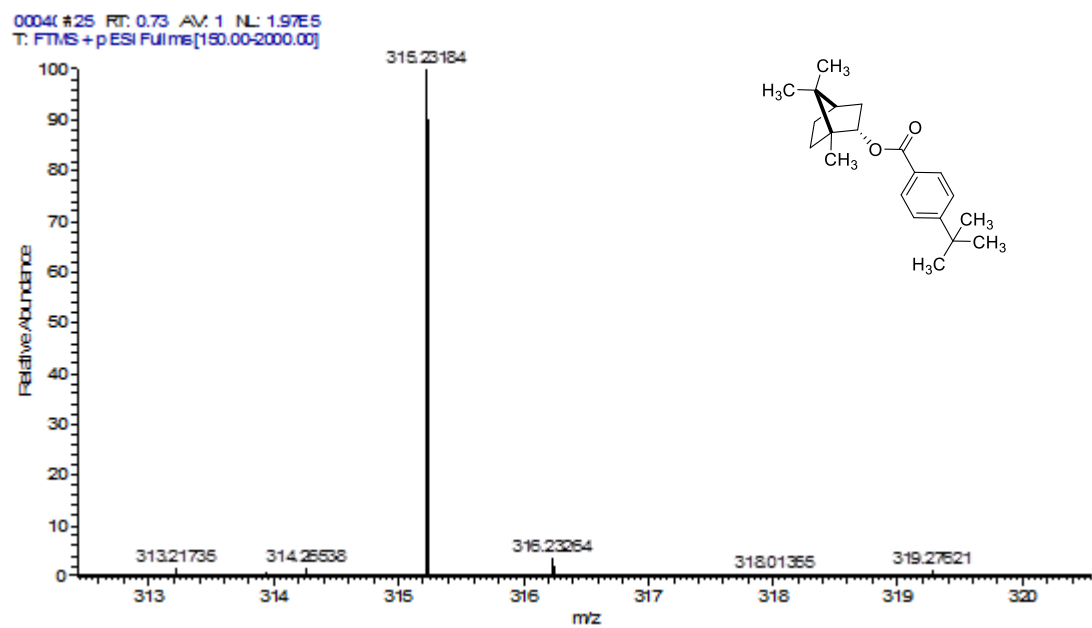

Figure 21 HRMS of **3g**

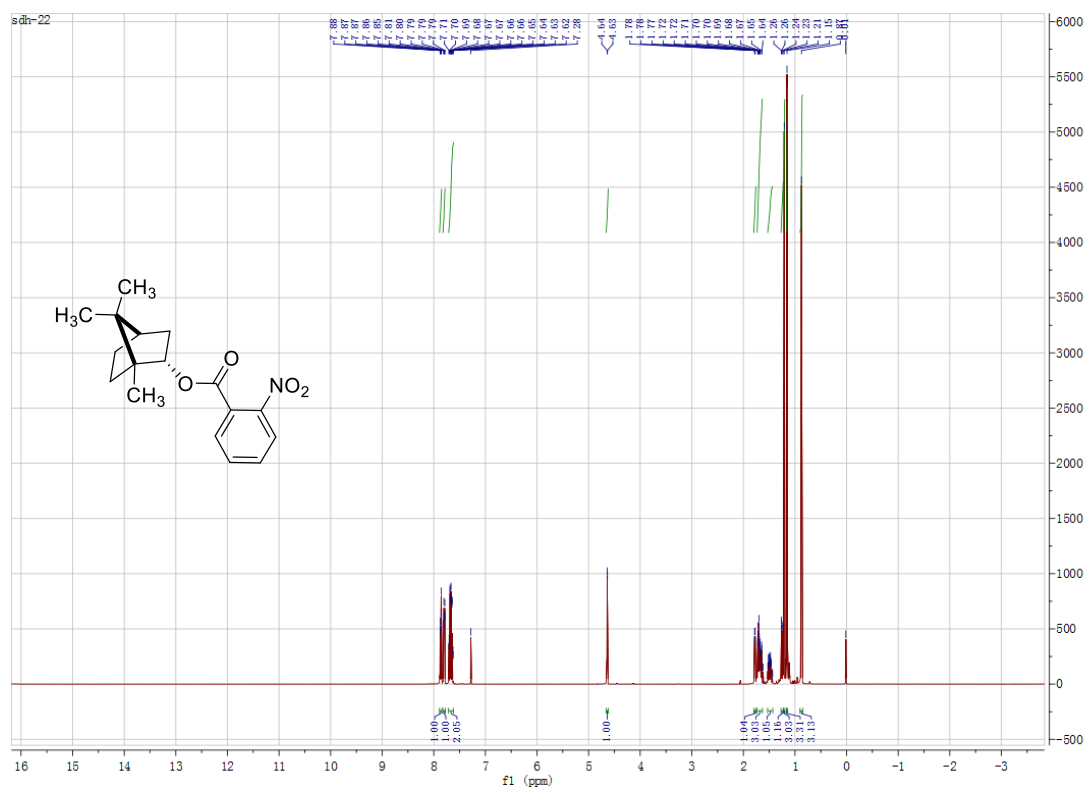

Figure 22  $^1\text{H}$ -NMR of **3h**

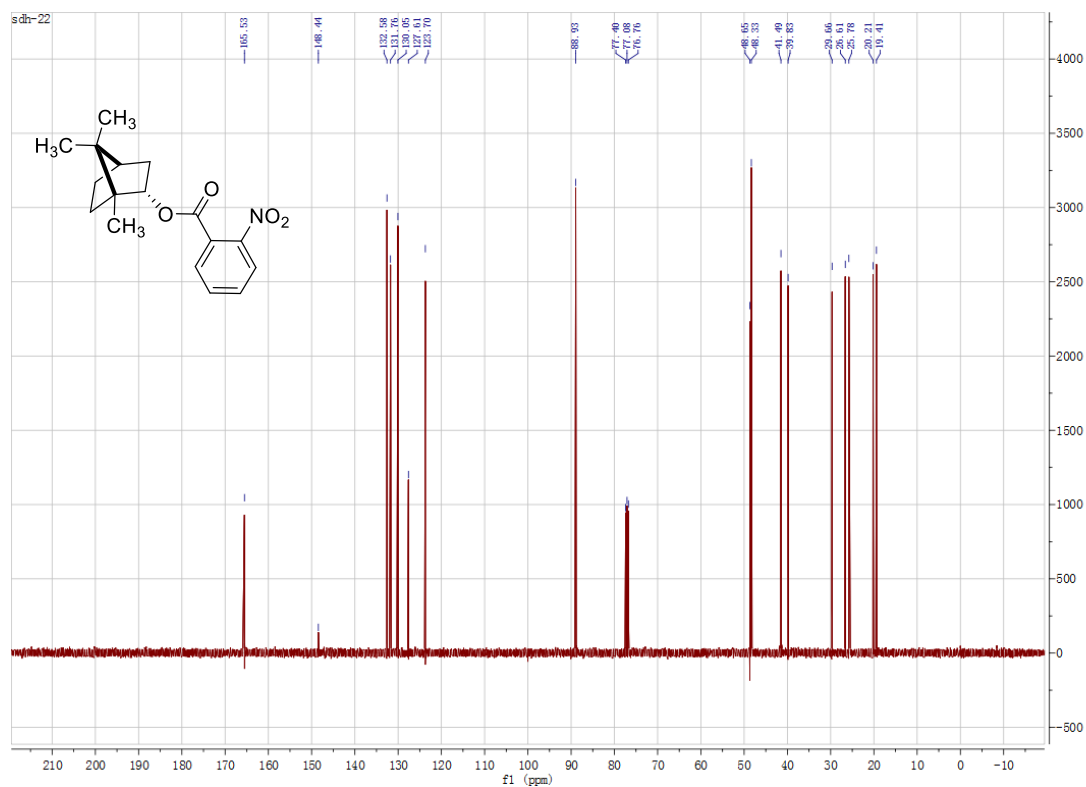

Figure 23  $^{13}\text{C}$ -NMR of **3h**

00020 #16 RT: 0.43 AV: 1 NL: 3.65E4  
T: FTMS + p ESI Full ms [150.00-2000.00]

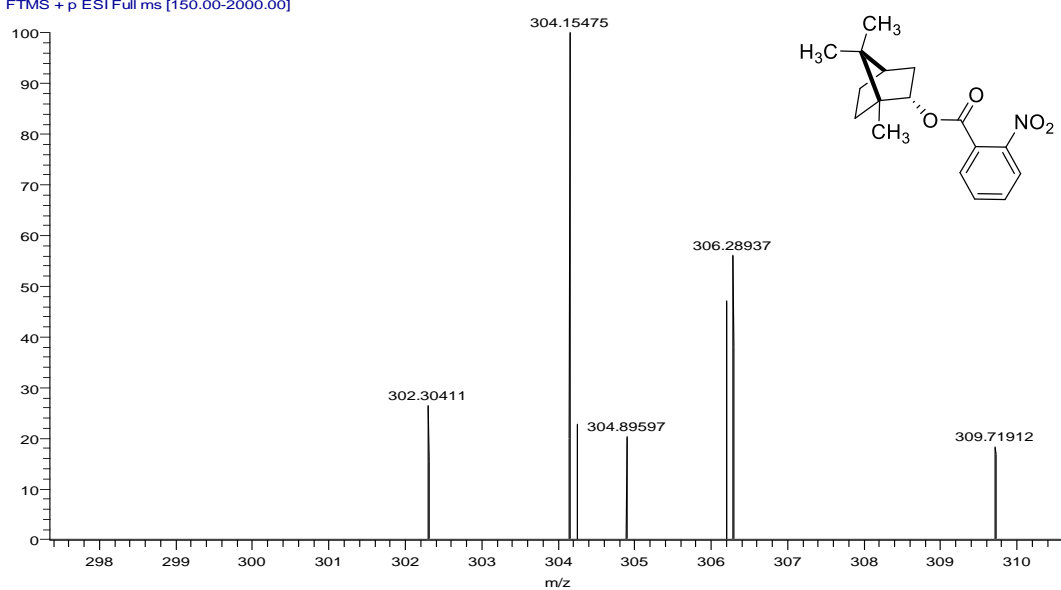

Figure 24 HRMS of **3h**

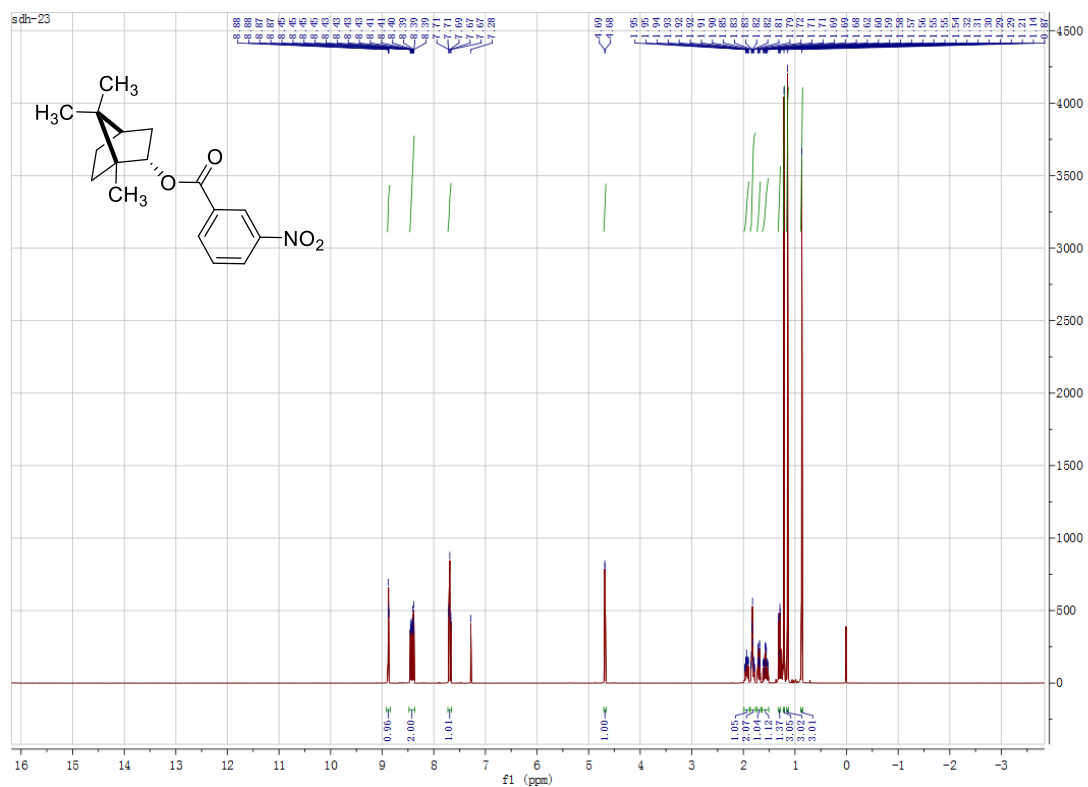

Figure 25  $^1\text{H}$ -NMR of **3i**

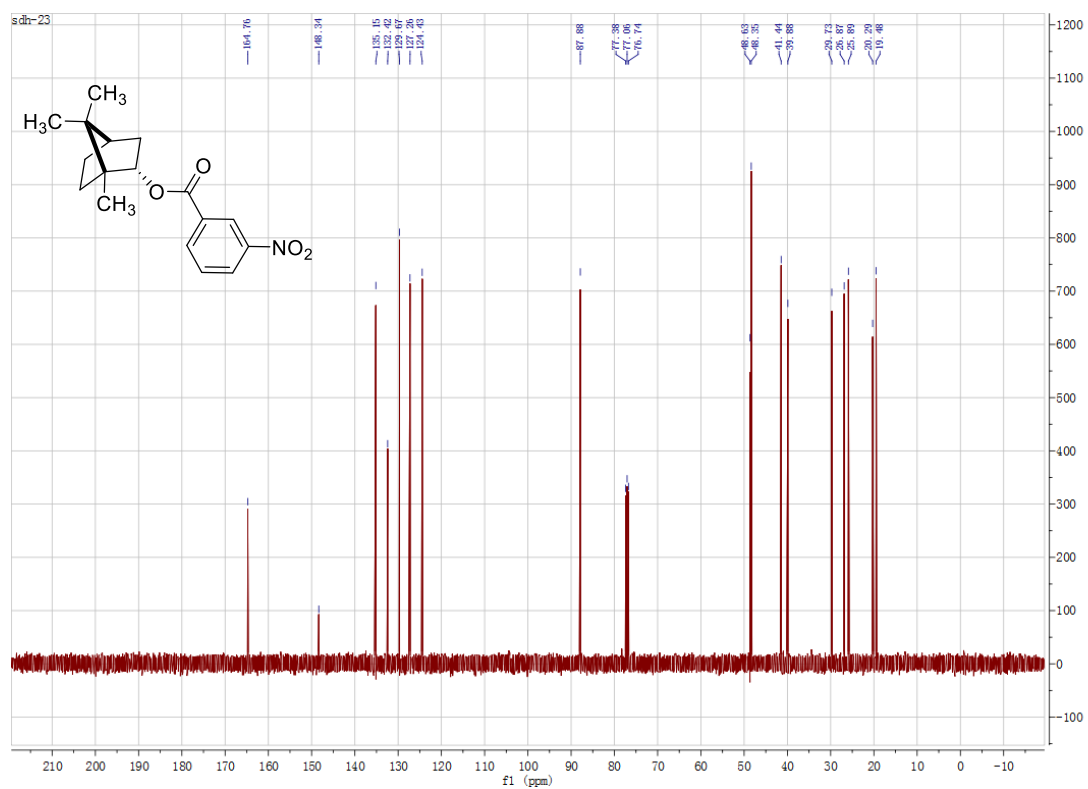

Figure 26  $^{13}\text{C}$ -NMR of **3i**

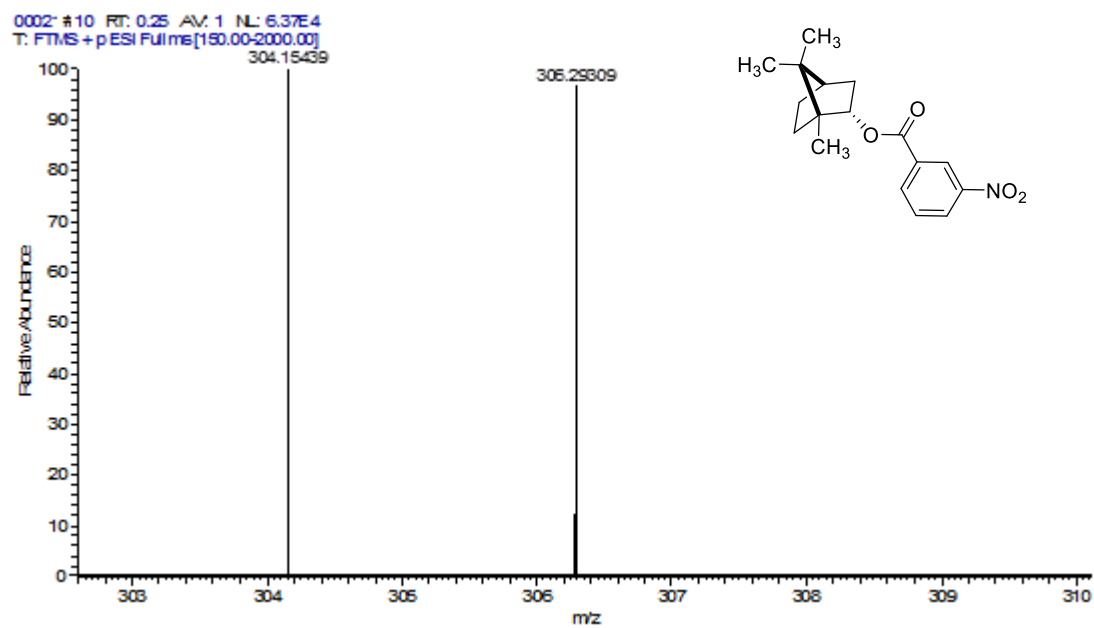

Figure 27 HRMS of 3i

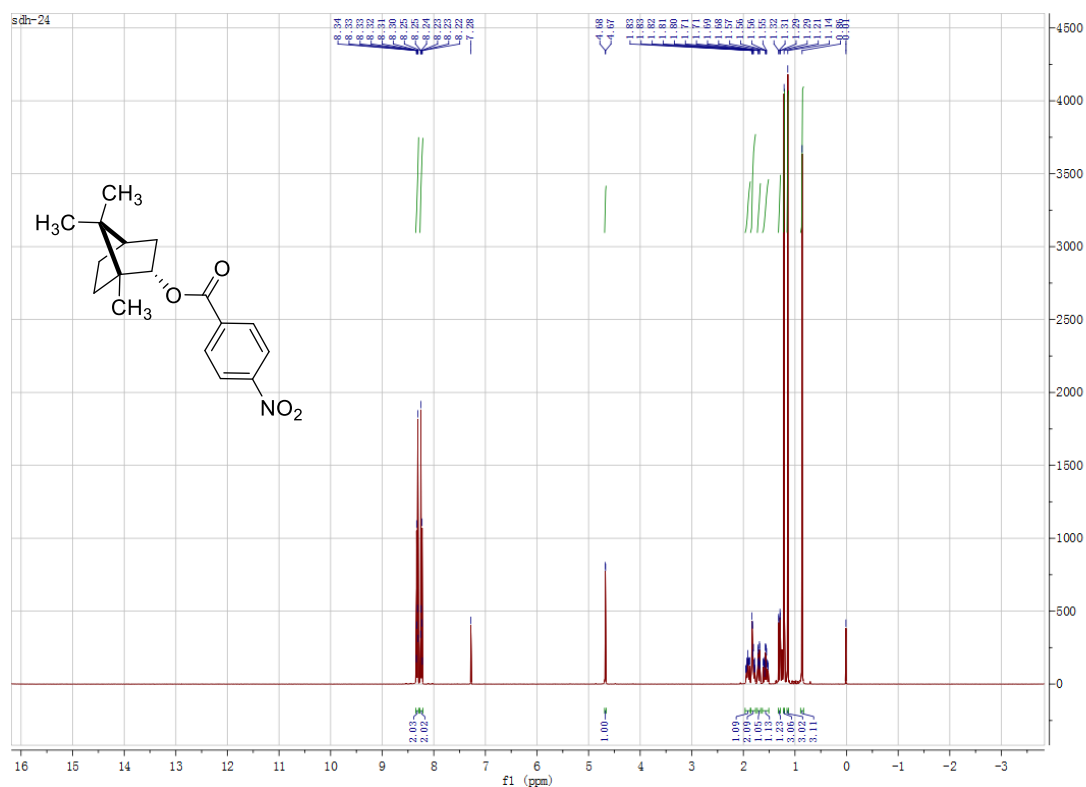

Figure 23 <sup>1</sup>H-NMR of 3j

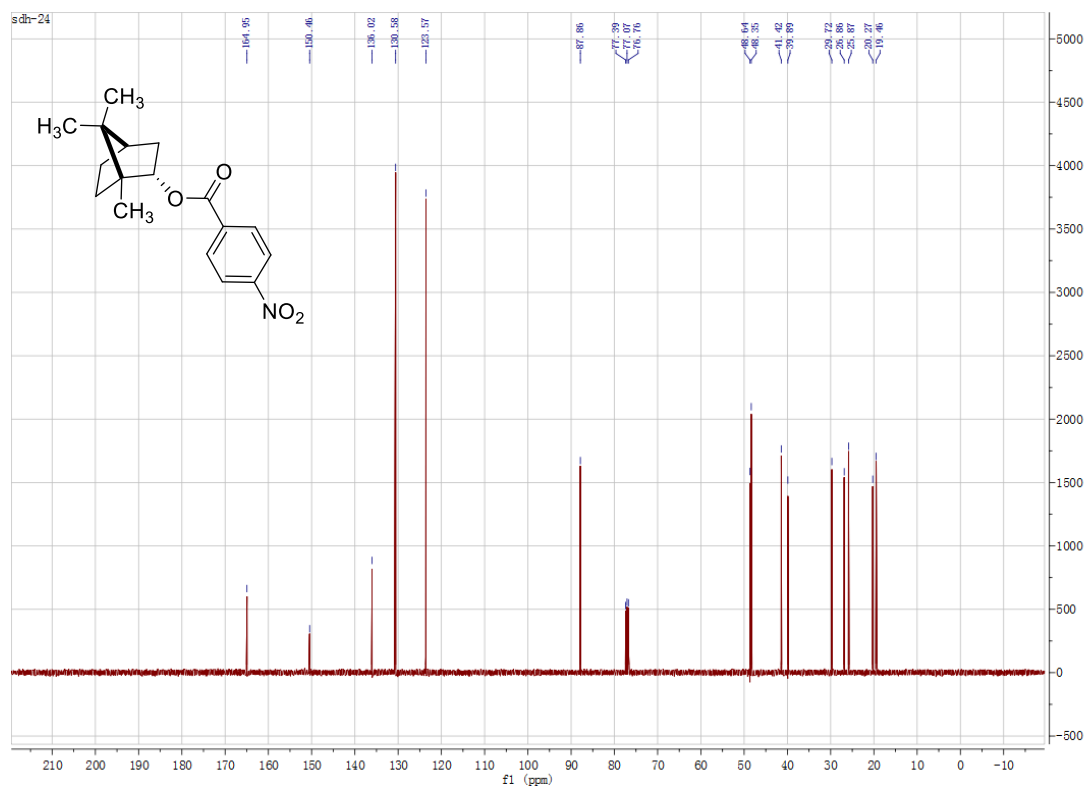

Figure 29  $^{13}\text{C}$ -NMR of **3j**

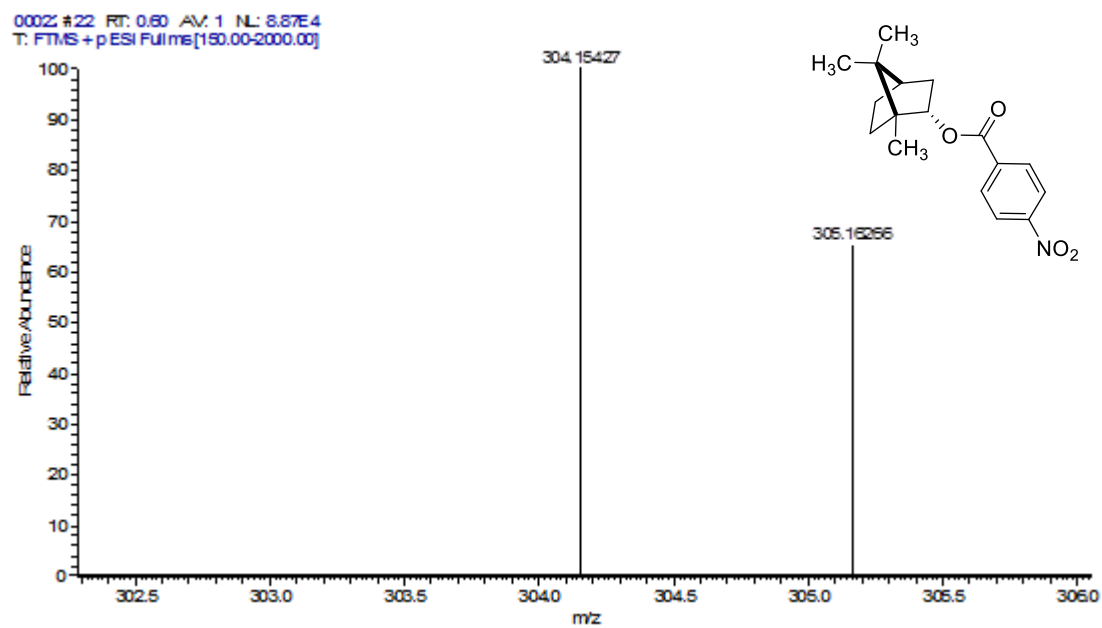

Figure 30 HRMS of **3j**



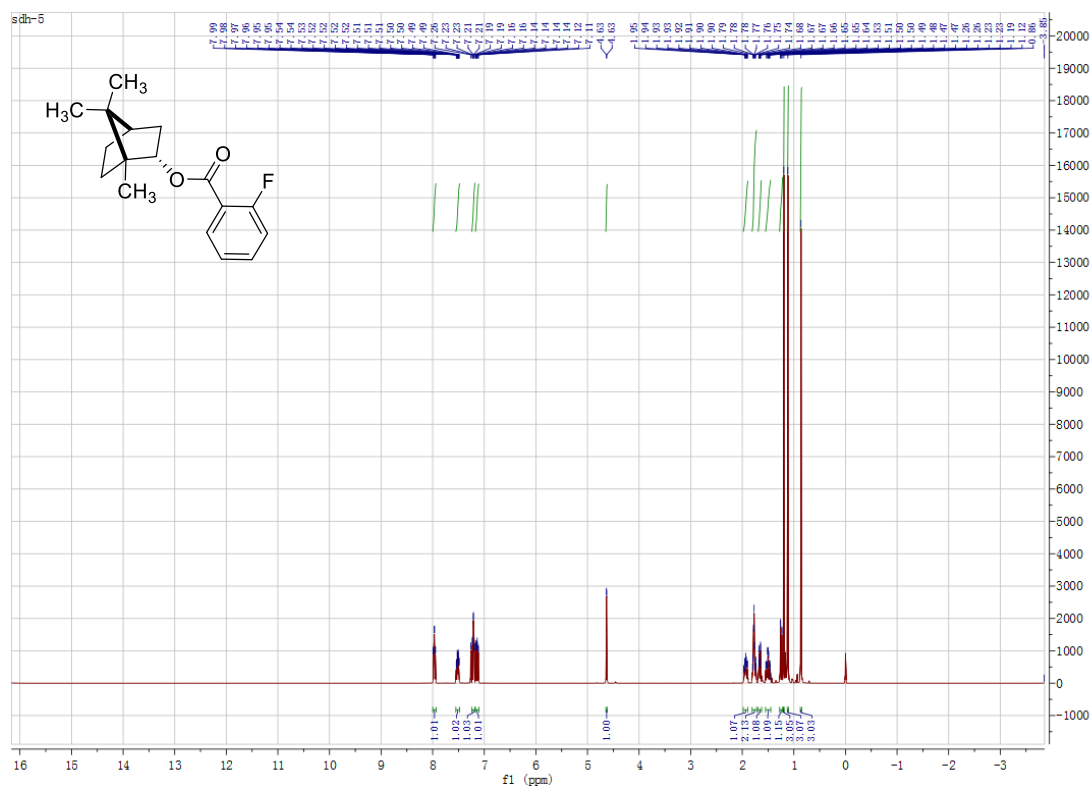

Figure 31 <sup>1</sup>H-NMR of 3k

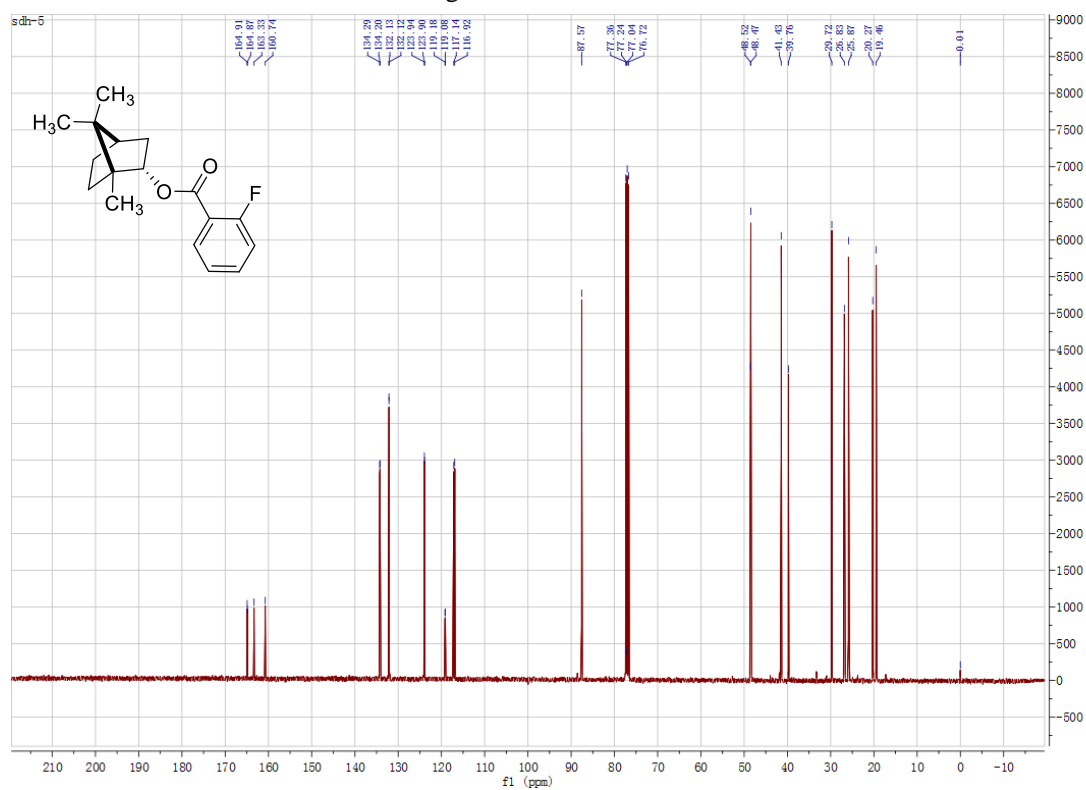

Figure 32 <sup>13</sup>C-NMR of 3k

00025 #15 RT: 0.41 AV: 1 NL: 8.78E6  
T: FTMS + p ESI Full ms [150.00-2000.00]

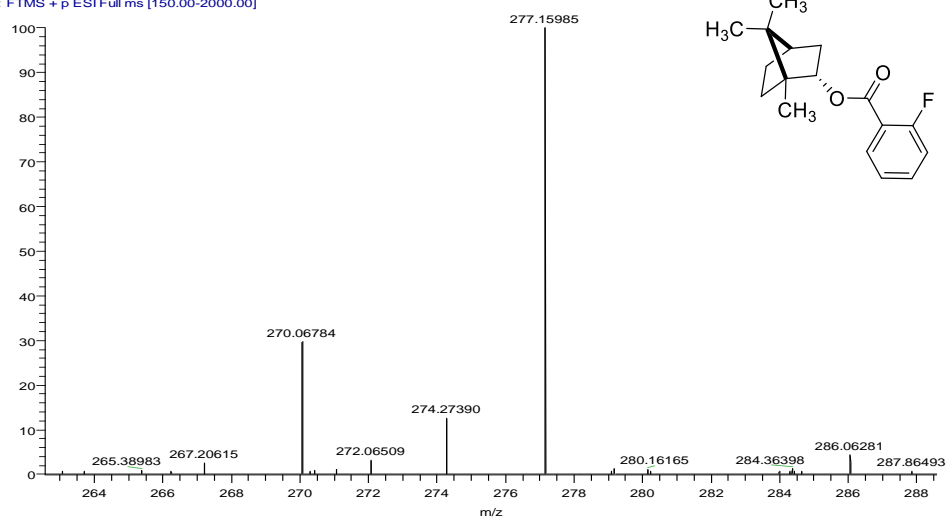

Figure 33 HRMS of 3k

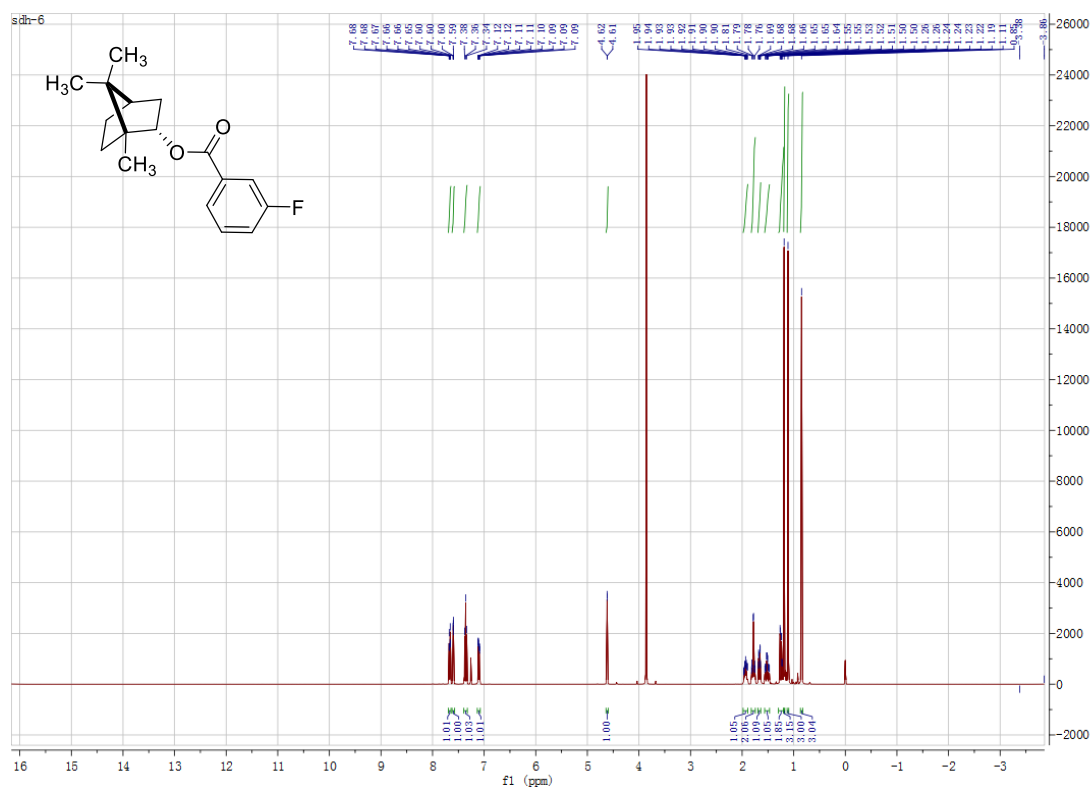

Figure 34 <sup>1</sup>H-NMR of 3l

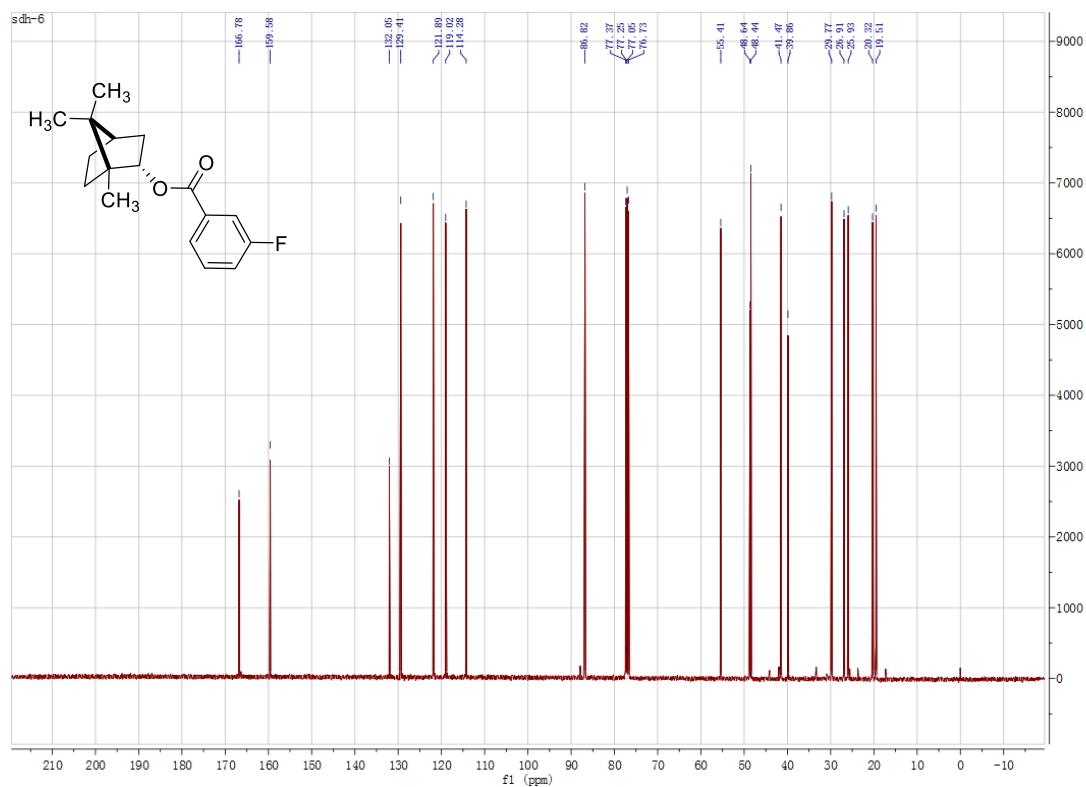

Figure 35  $^{13}\text{C}$ -NMR of 31

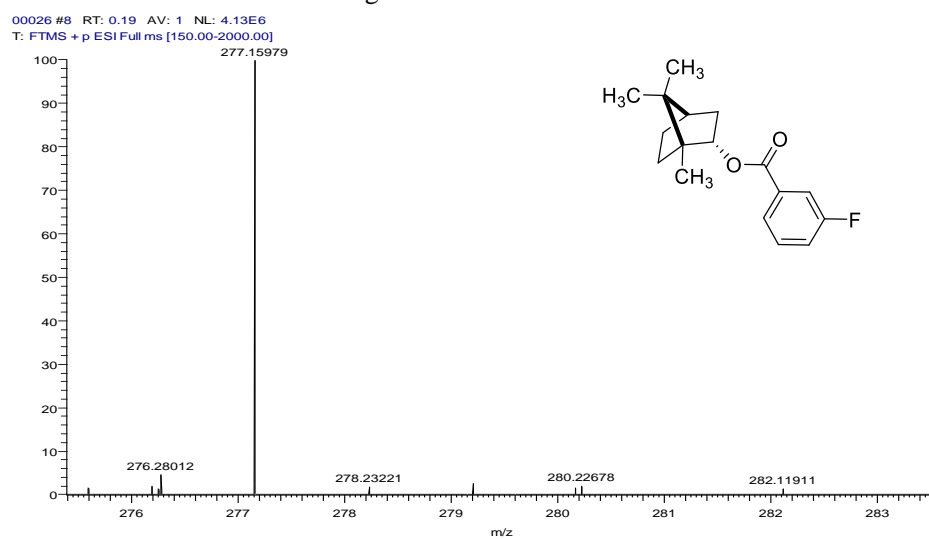

Figure 36 HRMS of 31

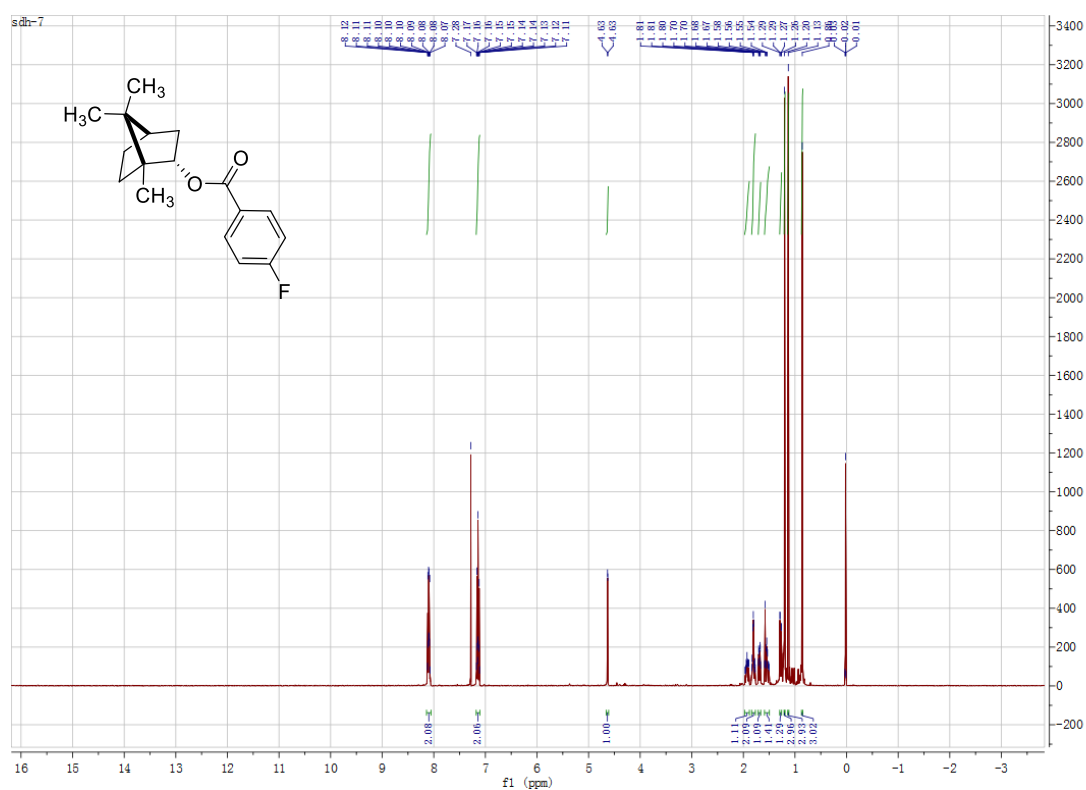

Figure 37  $^1\text{H}$ -NMR of **3m**

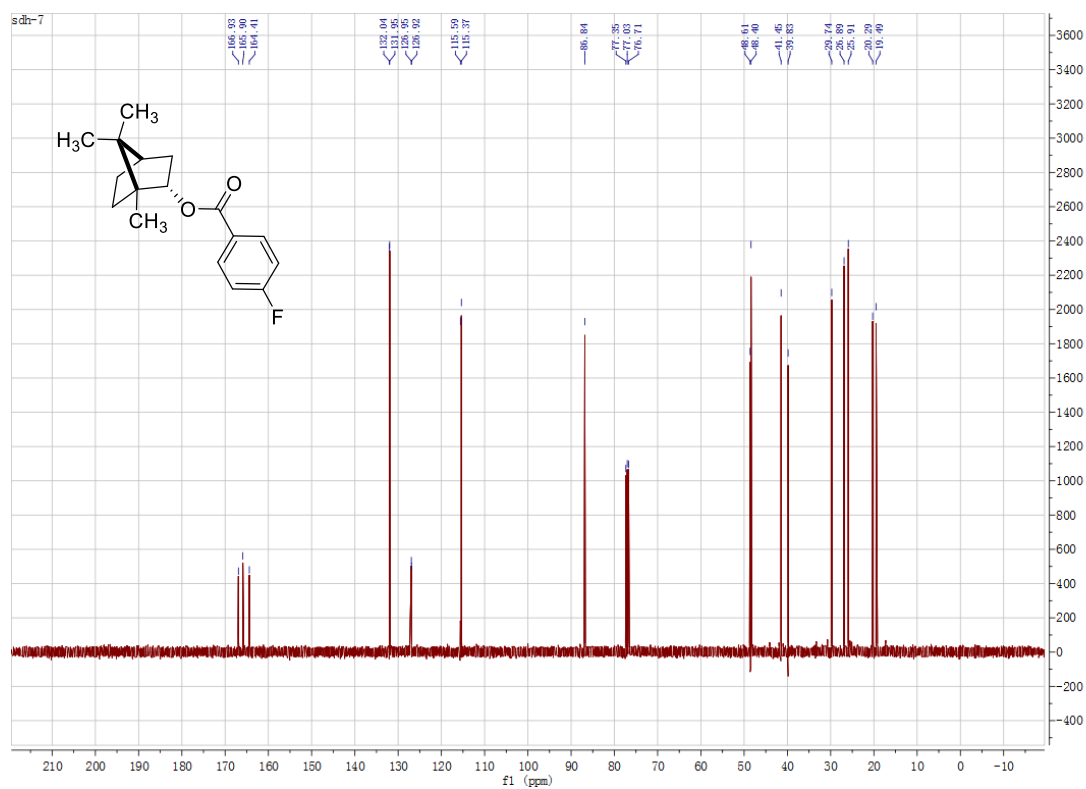

Figure 33  $^{13}\text{C}$ -NMR of **3m**

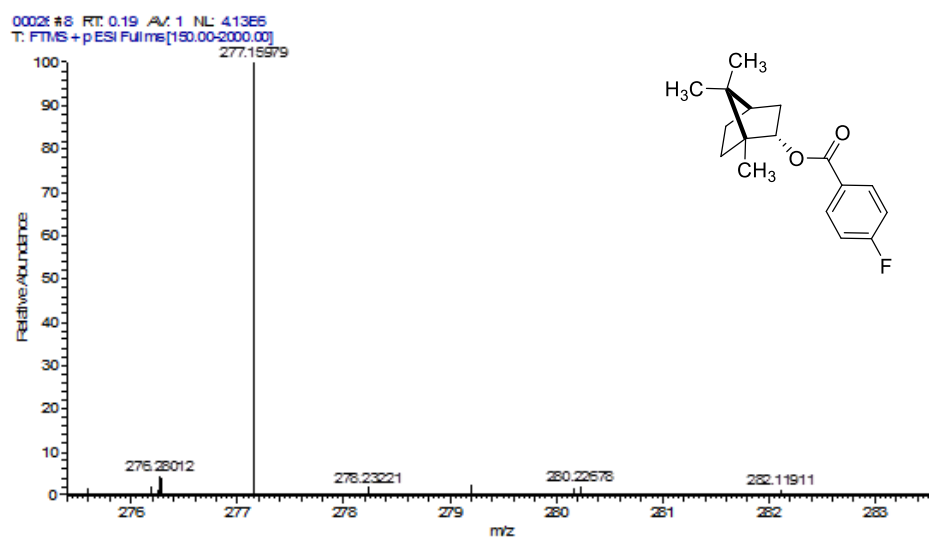

Figure 39 HRMS of **3m**

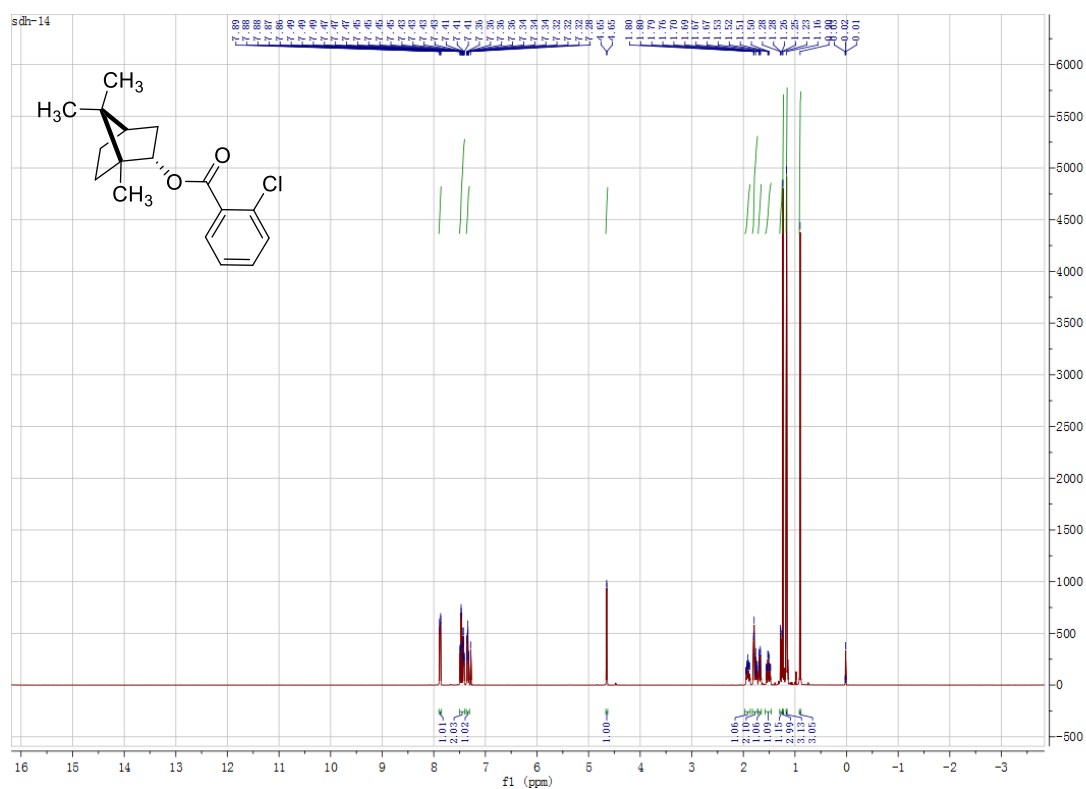

Figure 40  $^1\text{H}$ -NMR of **3n**

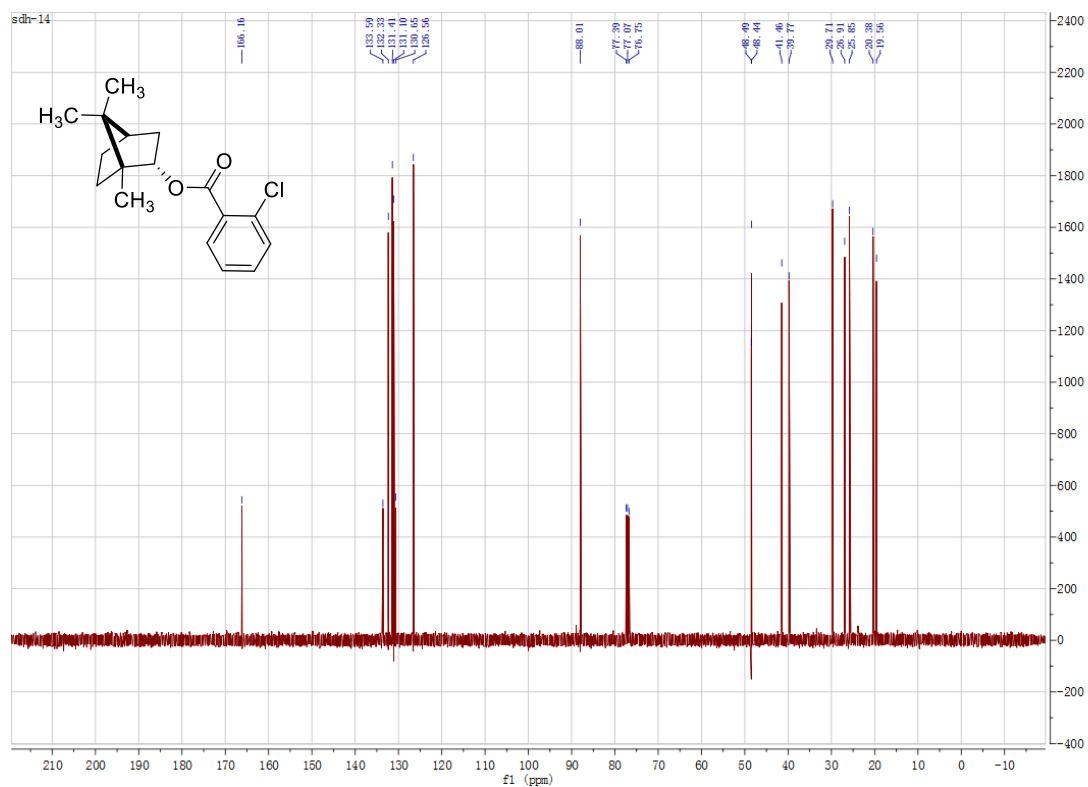

Figure 41  $^{13}\text{C}$ -NMR of **3n**

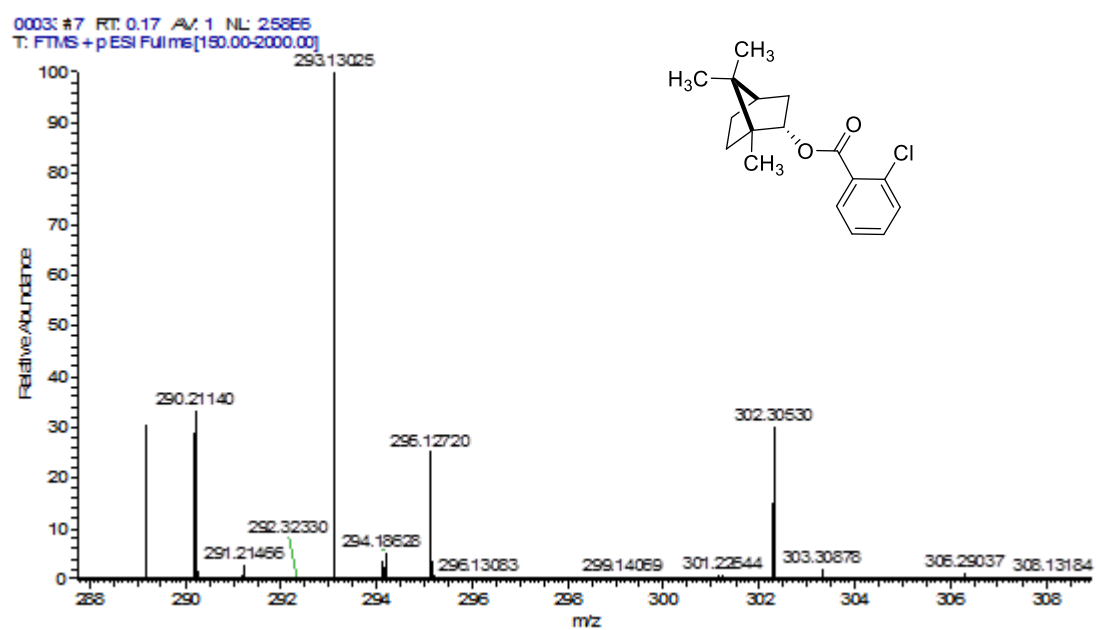

Figure 42 HRMS of **3n**

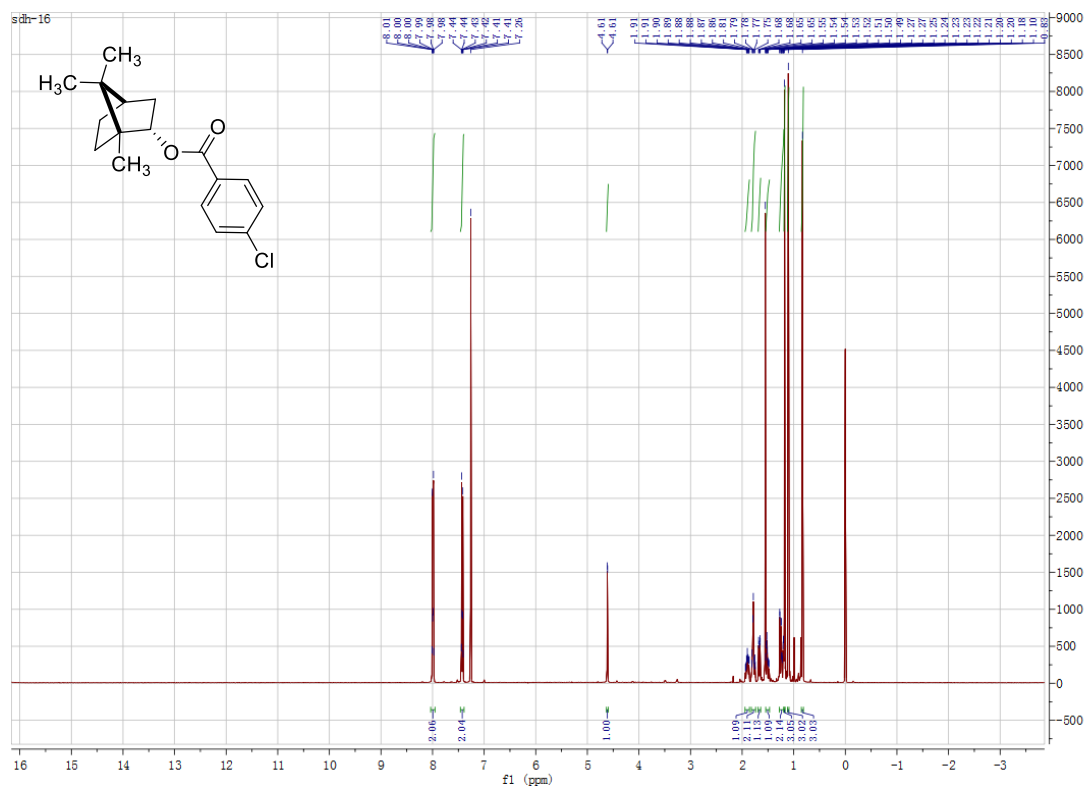

Figure 43 <sup>1</sup>H-NMR of **3o**

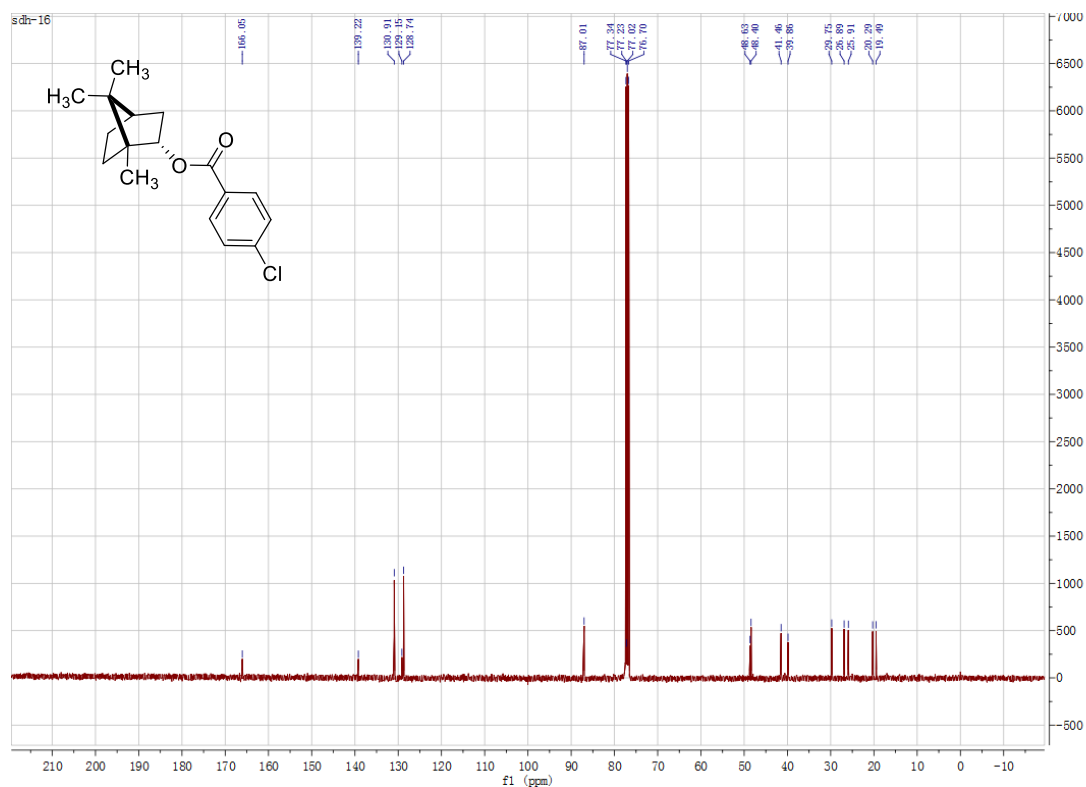

Figure 44 <sup>13</sup>C-NMR of **3o**

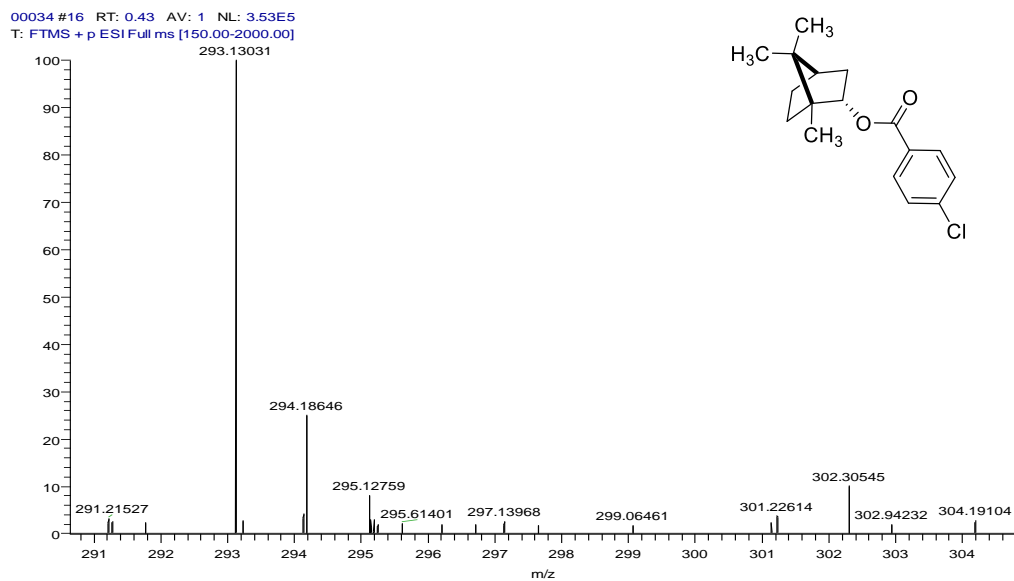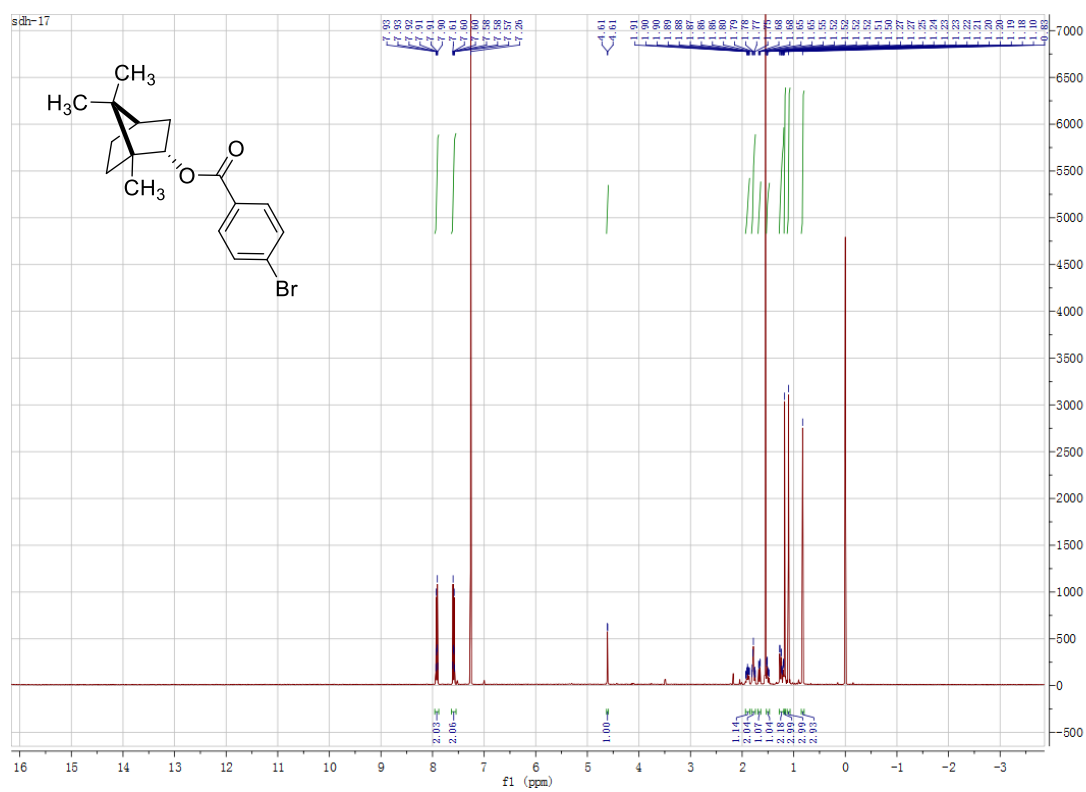



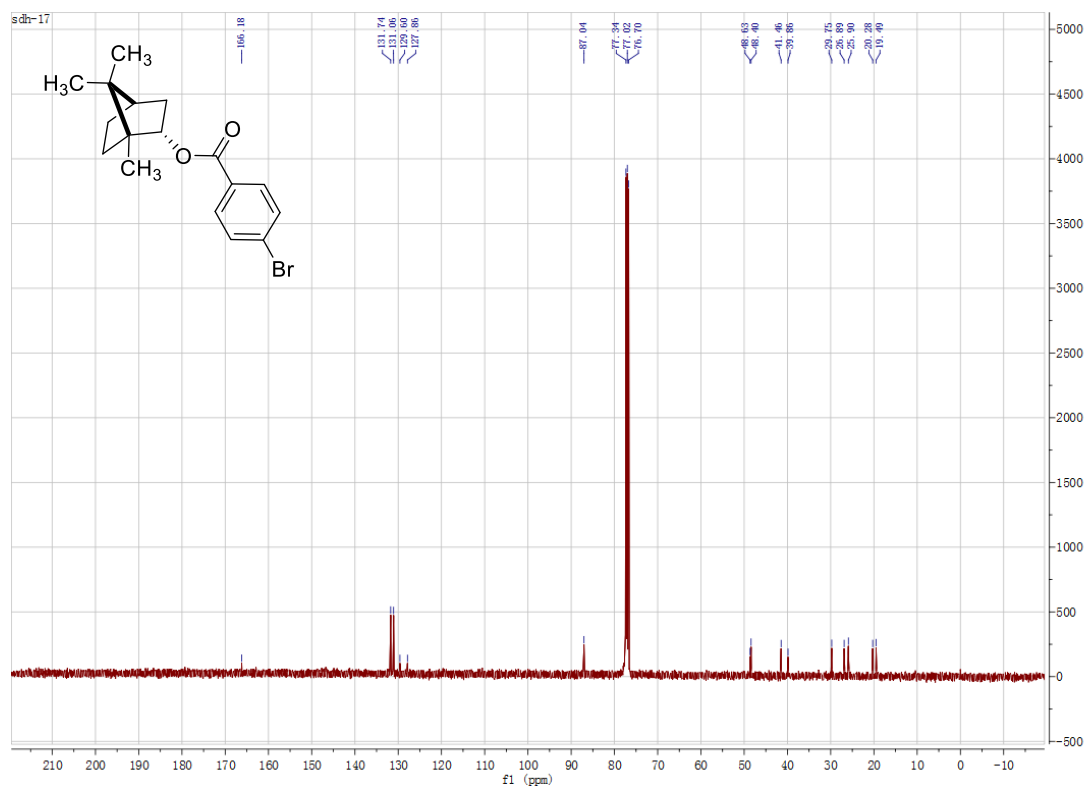

Figure 47  $^{13}\text{C}$ -NMR of **3p**

00035 #5 RT: 0.11 AV: 1 NL: 7.72E5  
T: FTMS + p ESI Full ms [150.00-2000.00]

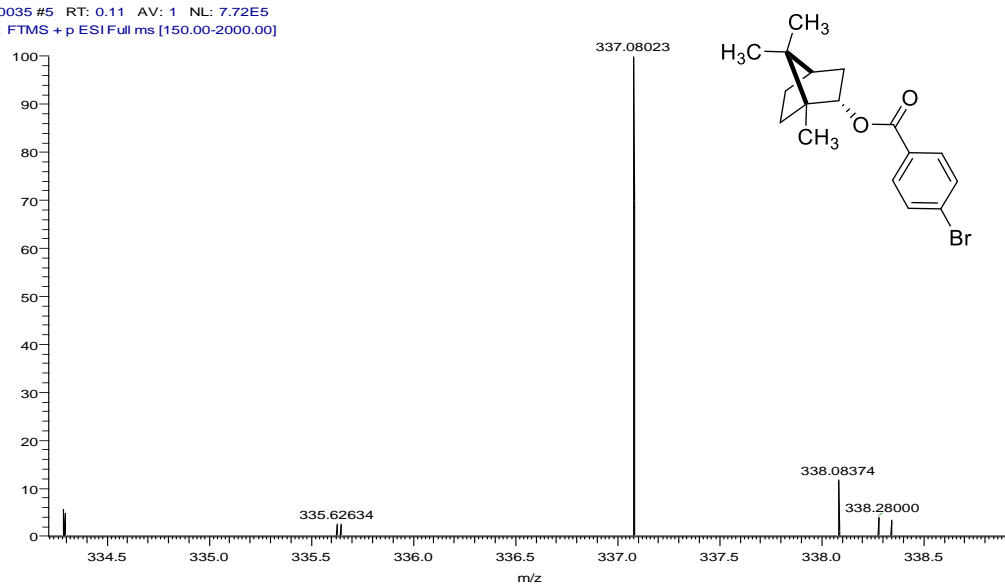

Figure 43 HRMS of **3p**

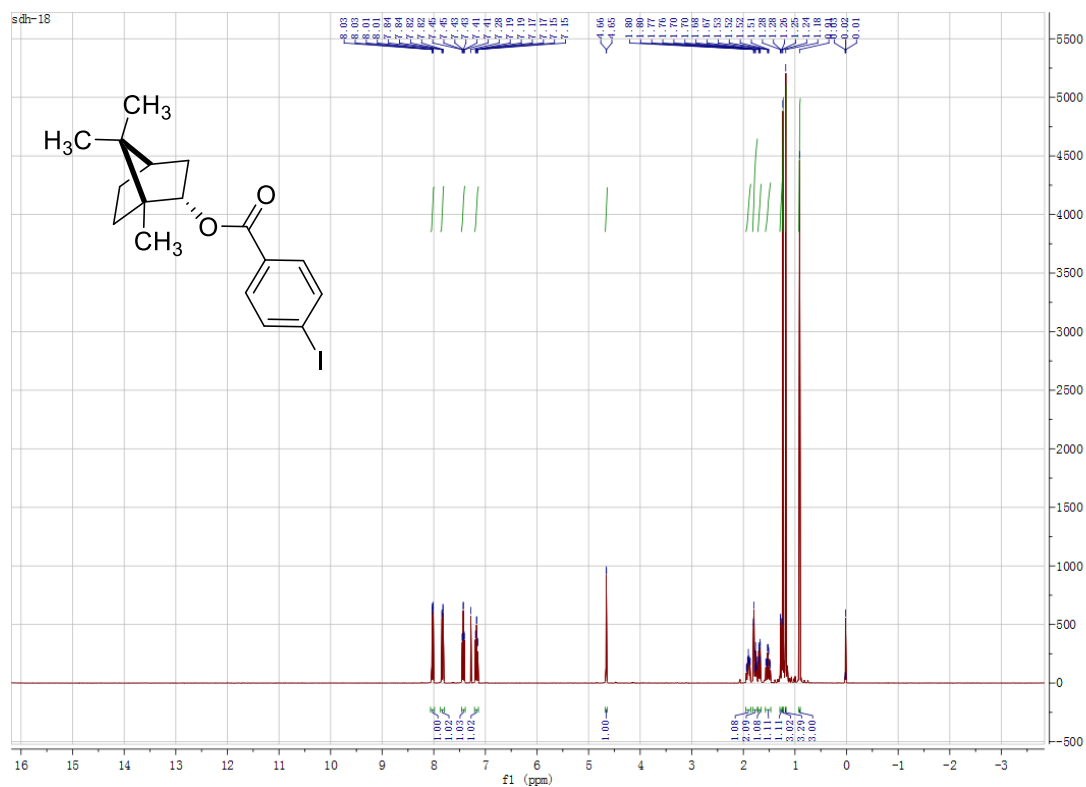

Figure 49  $^1\text{H}$ -NMR of **3q**

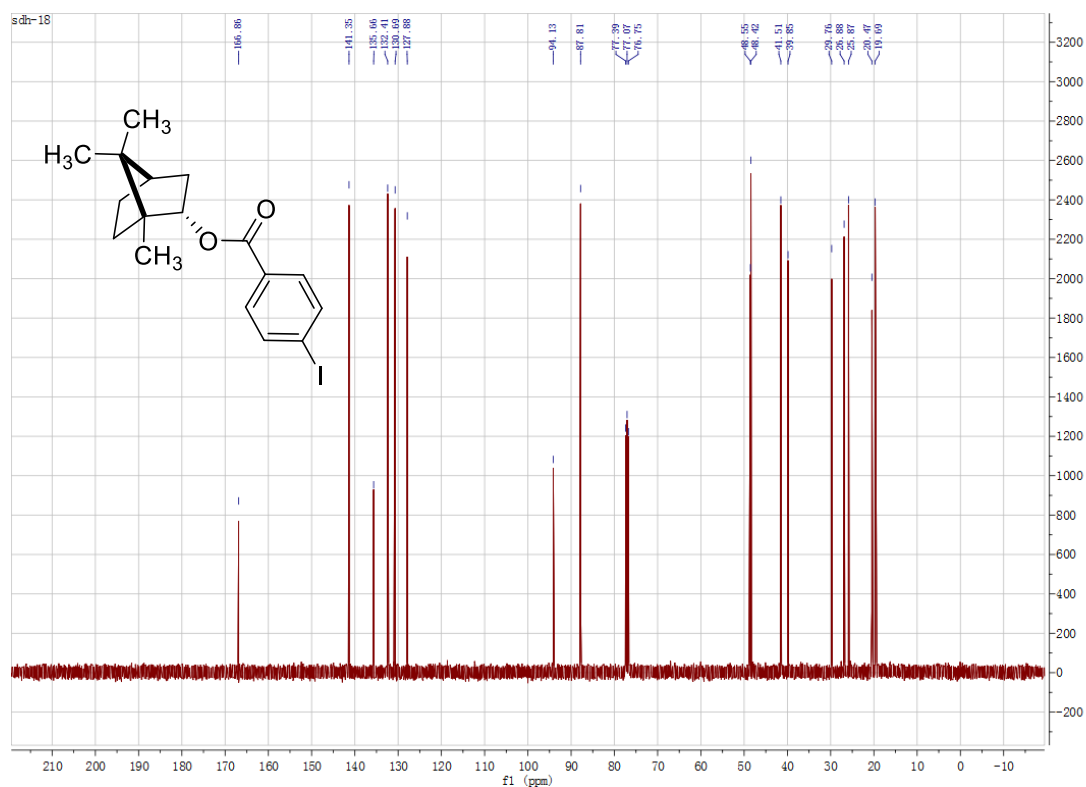

Figure 50  $^{13}\text{C}$ -NMR of **3q**

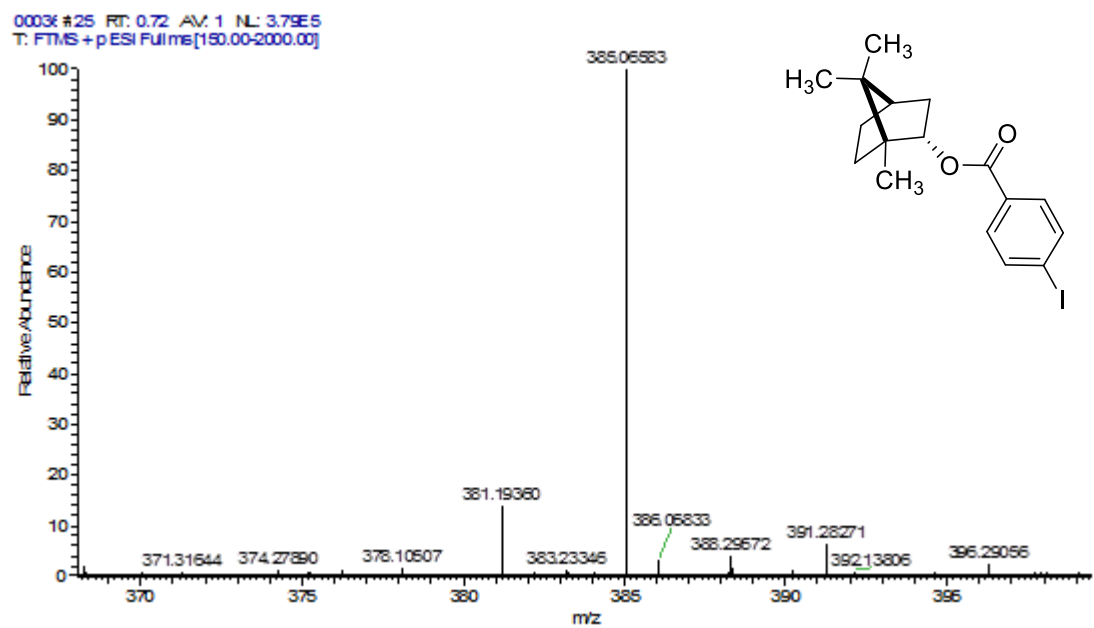

Figure 51 HRMS of 3q

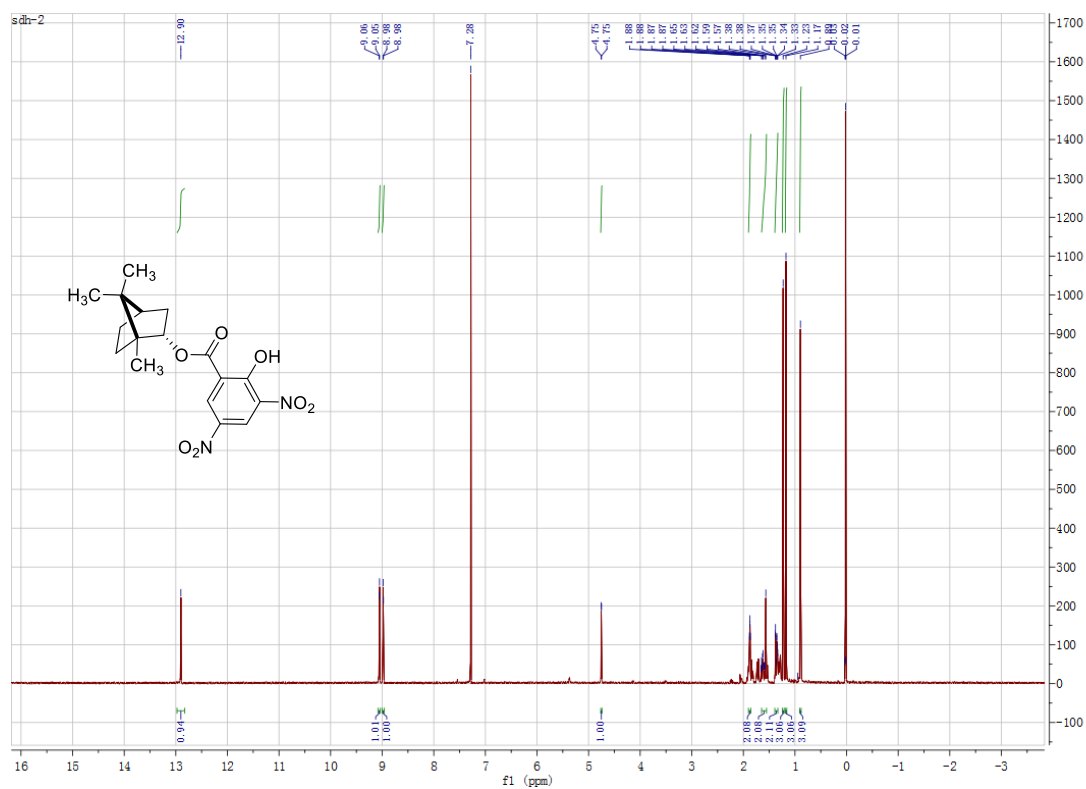

Figure 52 <sup>1</sup>H-NMR of 3r

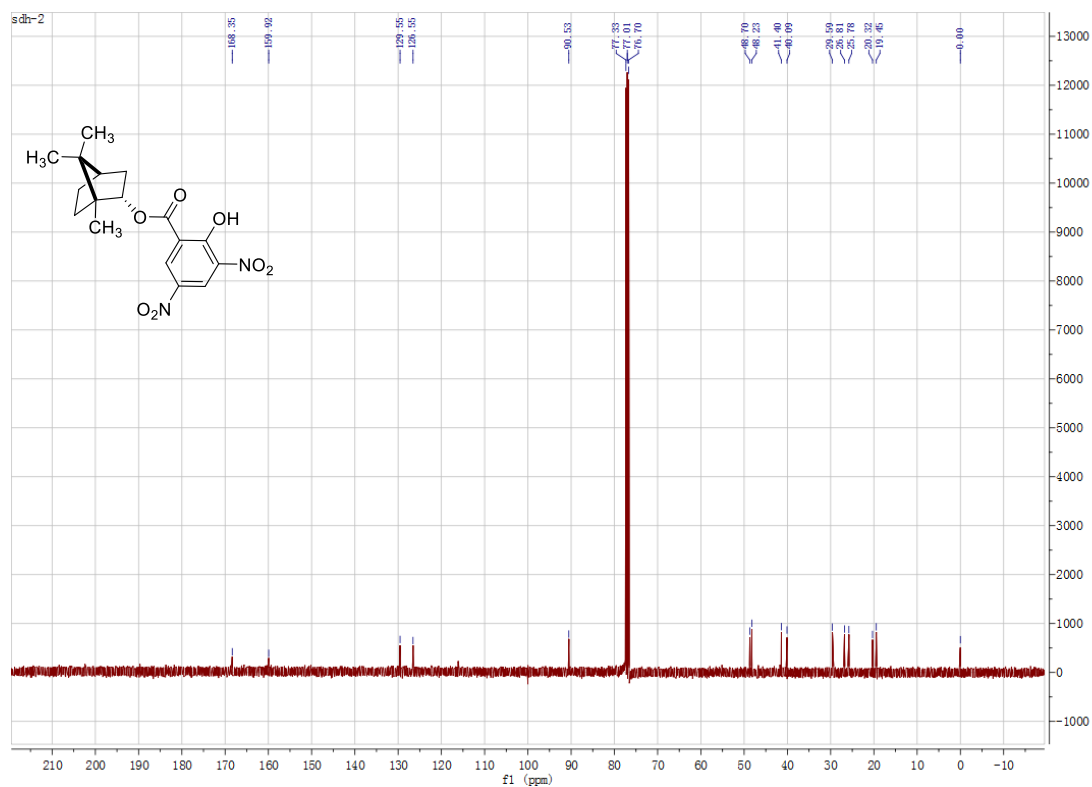

Figure 53 <sup>13</sup>C-NMR of **3r**

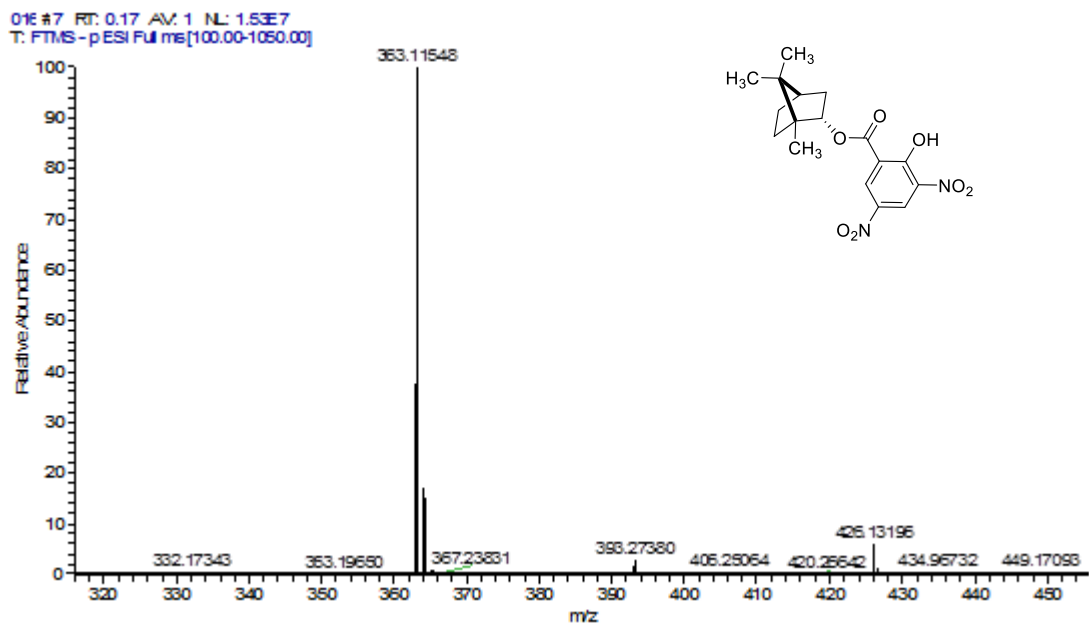

Figure 54 HRMS of **3r**

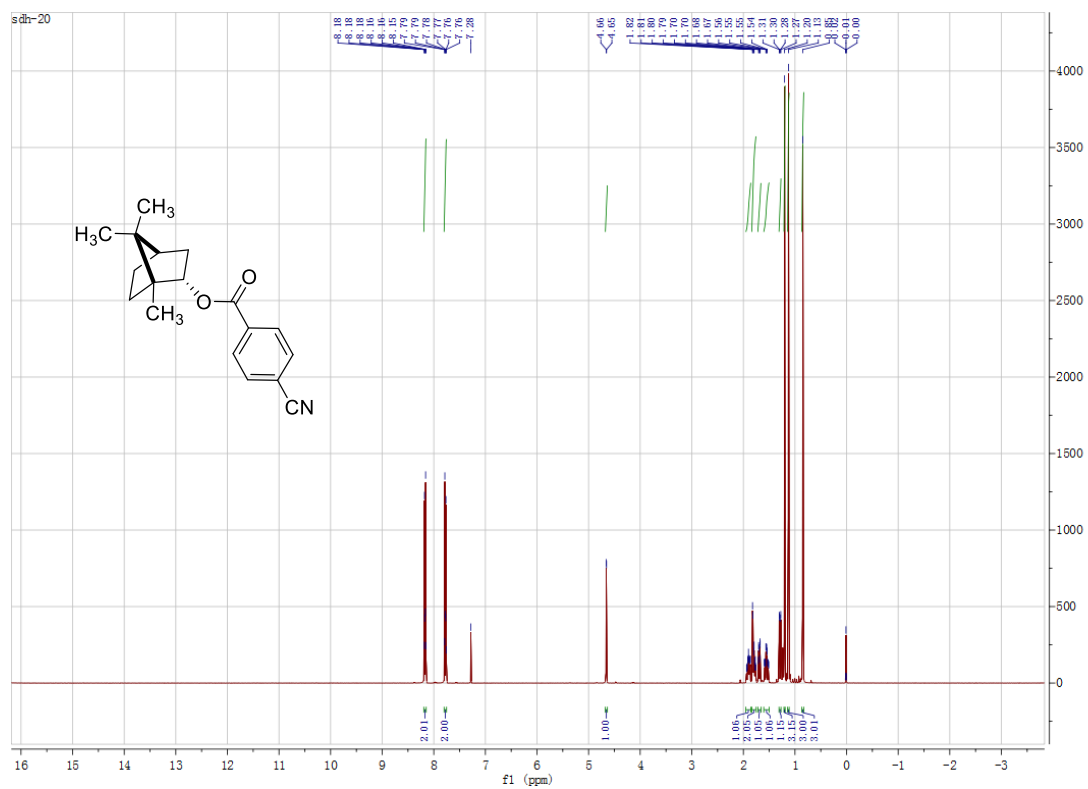

Figure 55 <sup>1</sup>H-NMR of 3s

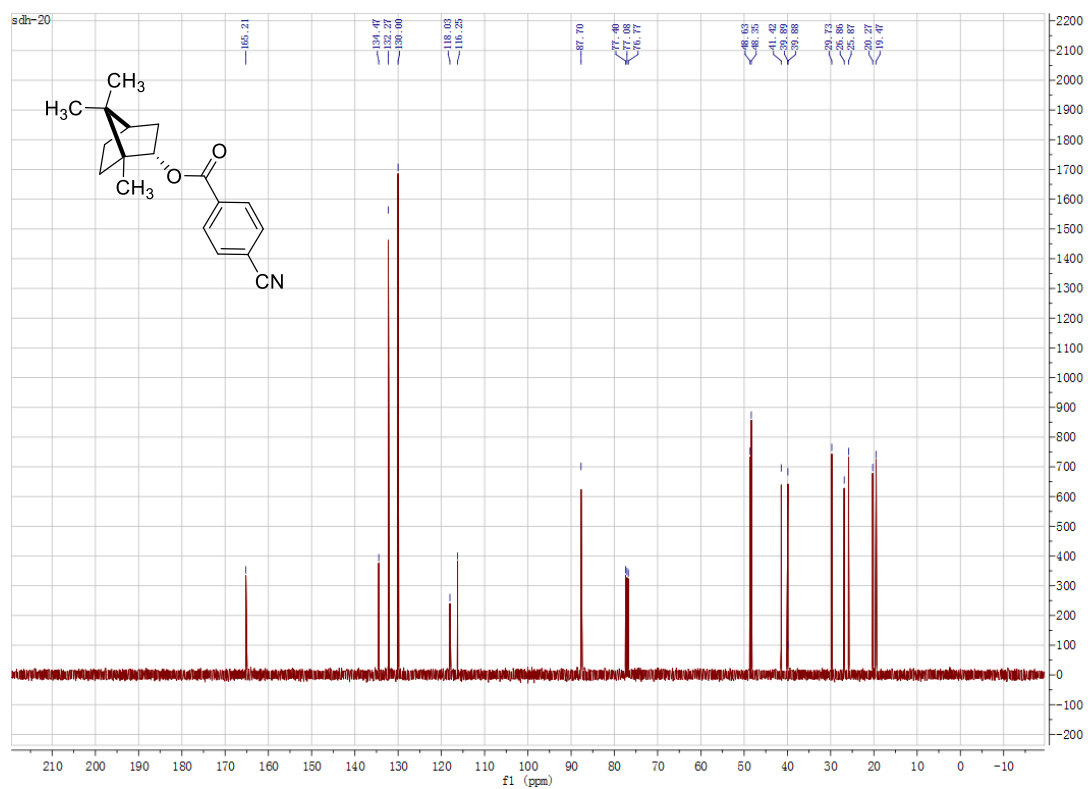

Figure 56 <sup>13</sup>C-NMR of 3s

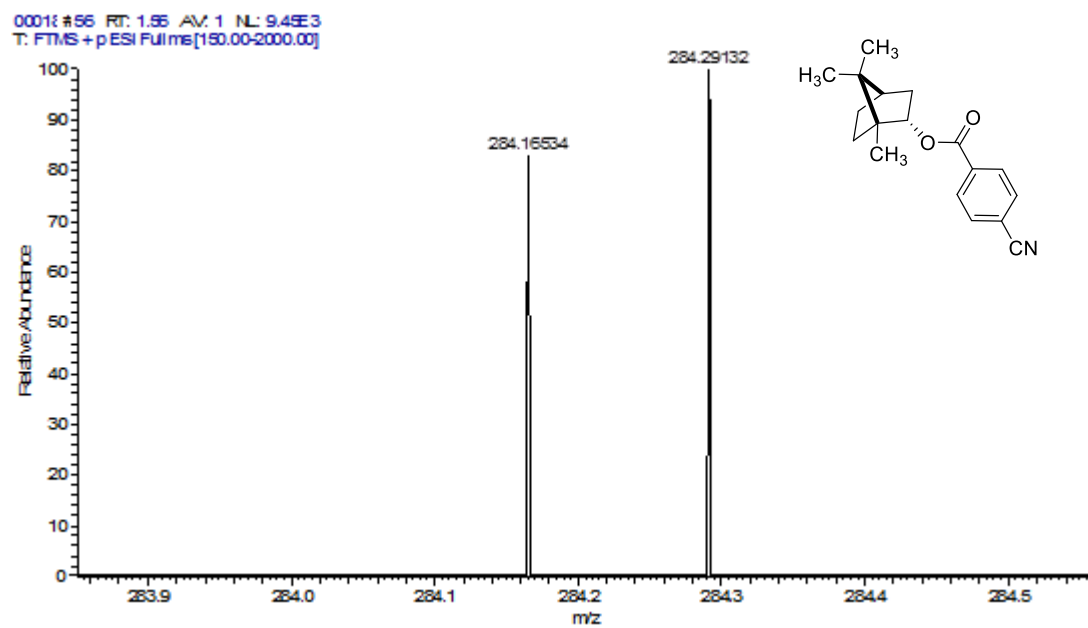

Figure 57 HRMS of 3s

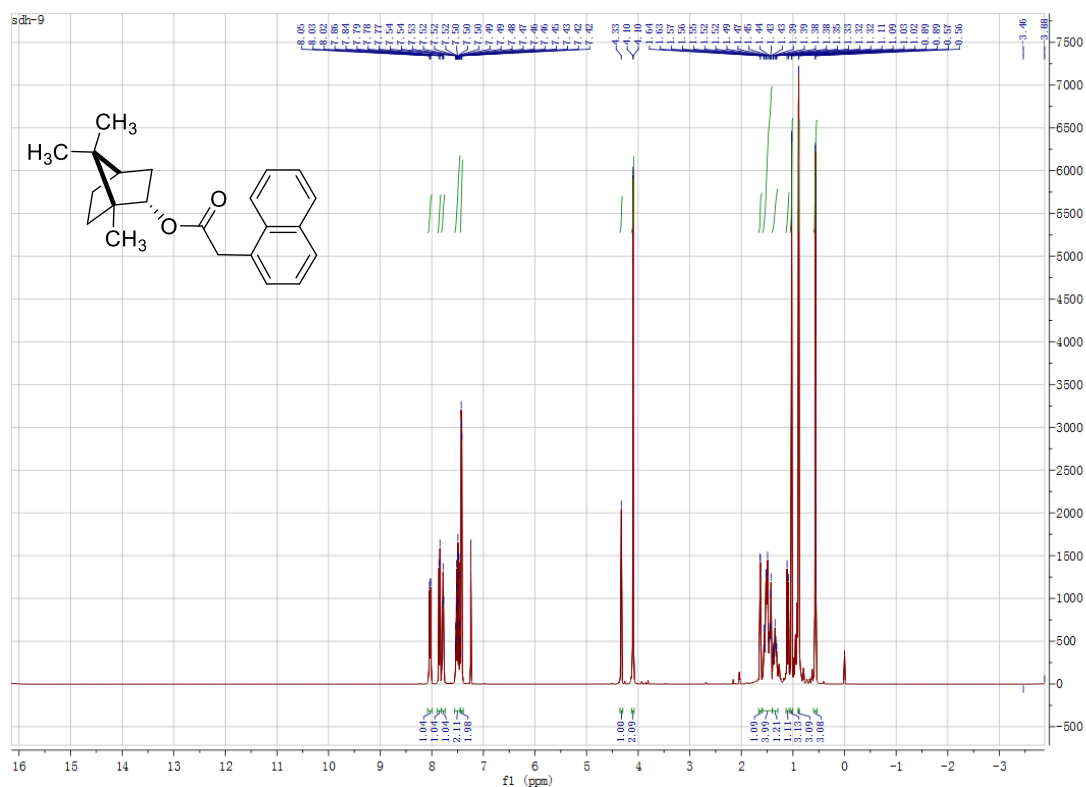

Figure 53  $^1\text{H}$ -NMR of 3t

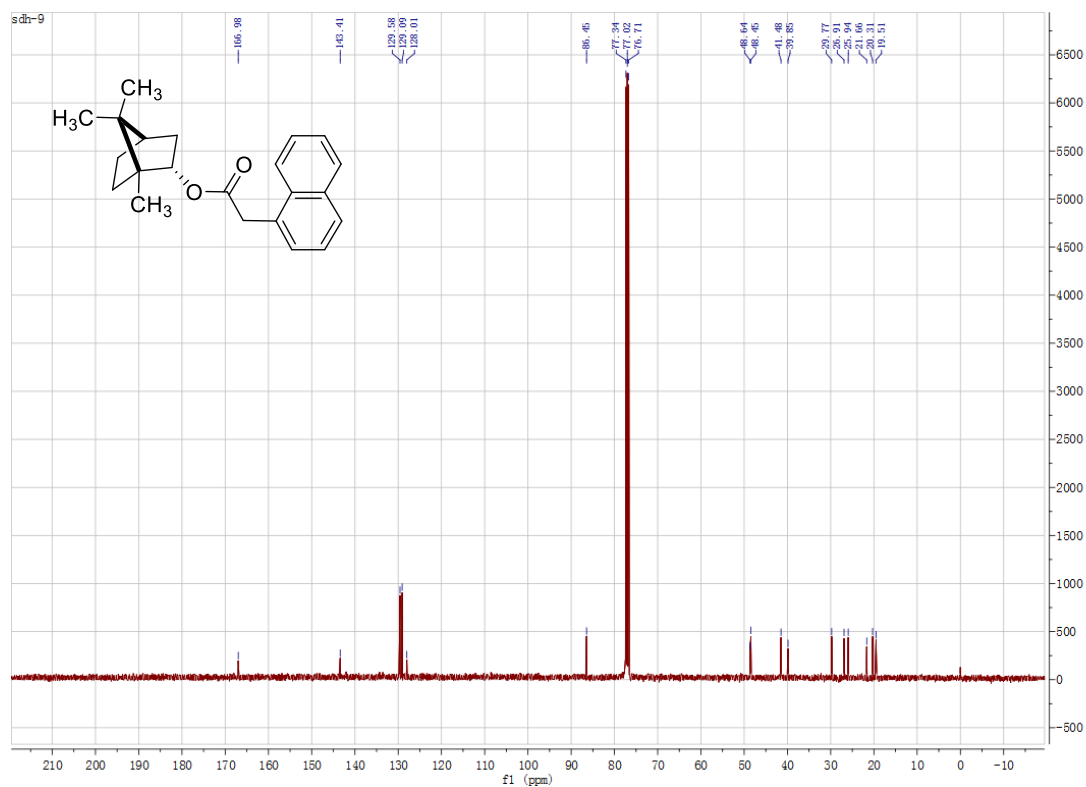

Figure 59 <sup>13</sup>C-NMR of **3t**

00028 #25 RT: 0.70 AV: 1 NL: 1.16E5  
T: FTMS + p ESI Full ms [150.00-2000.00]

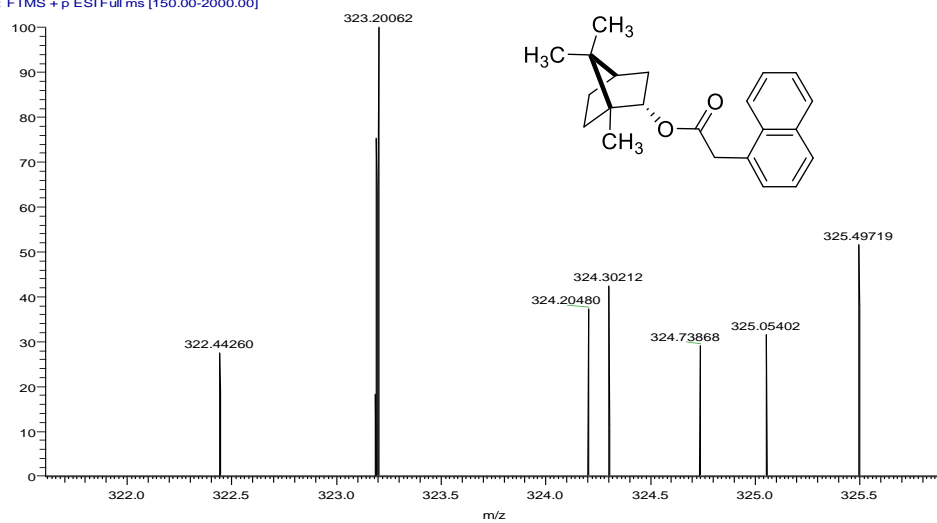

Figure 60 HRMS of **3s**
